# Supplementary material for: Nesprin-1α-Dependent Microtubule Nucleation from the Nuclear Envelope via Akap450 Is Necessary for Nuclear Positioning in Muscle Cells
Source: PubMed Central journal article supplement (PMC5640514; doi:10.1016/j.cub.2017.08.031), 2017-10-09
Supplement: mmc6.pdf [file mmc6.pdf]

# Current Biology

## Nesprin-1 $\alpha$ -Dependent Microtubule Nucleation from the Nuclear Envelope via Akap450 Is Necessary for Nuclear Positioning in Muscle Cells

### Graphical Abstract

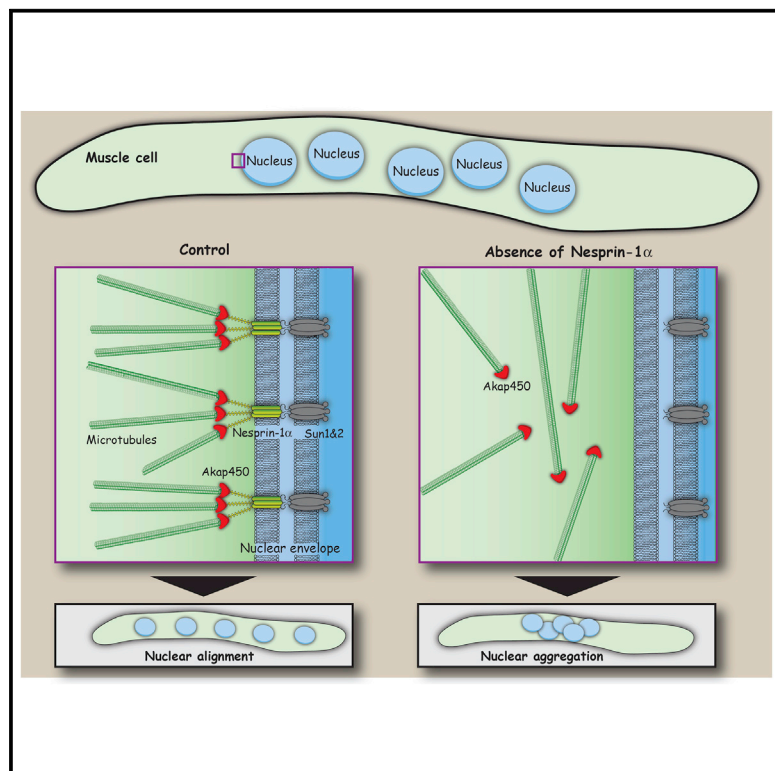

### Authors

Petra Gimpel, Yin Loon Lee, Radoslaw M. Sobota, ..., Brian Burke, Bruno Cadot, Edgar R. Gomes

### Correspondence

cadotbruno@gmail.com (B.C.),  
edgargomes@medicina.ulisboa.pt (E.R.G.)

### In Brief

Gimpel et al. find that LINC complexes comprising Nesprin-1 $\alpha$  and Sun1/2 are required for the recruitment of centrosomal proteins and Akap450-mediated microtubule nucleation activity to the myotube nuclear envelope. Absence of microtubule nucleation from the nucleus affects nuclear positioning in muscle cells *in vitro* and in computer simulations.

### Highlights

- BioID of Nesprin-1 $\alpha$  identifies centrosomal proteins at myotube nuclear envelope
- Nesprin-1 $\alpha$ -containing LINC complexes recruit Akap450 to myotube nuclear envelope
- Akap450 is required for microtubule nucleation at the nuclear envelope
- Microtubule nucleation at the nuclear envelope is involved in nuclear positioning

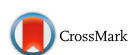

# Nesprin-1 $\alpha$ -Dependent Microtubule Nucleation from the Nuclear Envelope via Akap450 Is Necessary for Nuclear Positioning in Muscle Cells

Petra Gimpel,<sup>1,8</sup> Yin Loon Lee,<sup>2,8</sup> Radoslaw M. Sobota,<sup>3</sup> Alessandra Calvi,<sup>2</sup> Victoria Koullourou,<sup>5</sup> Rutti Patel,<sup>5</sup> Kamel Mamchaoui,<sup>1</sup> François Nédélec,<sup>4</sup> Sue Shackleton,<sup>5</sup> Jan Schmoranzler,<sup>6</sup> Brian Burke,<sup>2</sup> Bruno Cadot,<sup>1,\*</sup> and Edgar R. Gomes<sup>1,7,9,\*</sup>

<sup>1</sup>Sorbonne Universités UPMC Université Paris 06, INSERM U974, CNRS FRE3617, Center for Research in Myology, GH Pitié Salpêtrière, 47 Boulevard de l'Hôpital, 75013 Paris, France

<sup>2</sup>Institute of Medical Biology, Agency for Science, Technology and Research (A\*STAR), 8A Biomedical Grove, No. 06-06 Immunos, Singapore 138648, Singapore

<sup>3</sup>Institute of Molecular and Cell Biology, Agency for Science, Technology and Research (A\*STAR), 61 Biopolis Drive, No. 07-48A Proteos, Singapore 138673, Singapore

<sup>4</sup>Cell Biology and Biophysics Unit, European Molecular Biology Laboratory, 69117 Heidelberg, Germany

<sup>5</sup>Department of Molecular and Cell Biology, Henry Wellcome Building, University of Leicester, Lancaster Road, Leicester LE1 7RH, UK

<sup>6</sup>Charité-Universitätsmedizin Berlin, Virchowweg 6, 10117 Berlin, Germany

<sup>7</sup>Instituto de Medicina Molecular, Faculdade de Medicina, Universidade de Lisboa, Avenida Professor Egas Moniz, 1649-028 Lisbon, Portugal

<sup>8</sup>These authors contributed equally

<sup>9</sup>Lead Contact

\*Correspondence: [cadotbruno@gmail.com](mailto:cadotbruno@gmail.com) (B.C.), [edgargomes@medicina.ulisboa.pt](mailto:edgargomes@medicina.ulisboa.pt) (E.R.G.)

<http://dx.doi.org/10.1016/j.cub.2017.08.031>

## SUMMARY

The nucleus is the main microtubule-organizing center (MTOC) in muscle cells due to the accumulation of centrosomal proteins and microtubule (MT) nucleation activity at the nuclear envelope (NE) [1–4]. The relocalization of centrosomal proteins, including Pericentrin, Pcm1, and  $\gamma$ -tubulin, depends on Nesprin-1, an outer nuclear membrane (ONM) protein that connects the nucleus to the cytoskeleton via its N-terminal region [5–7]. Nesprins are also involved in the recruitment of kinesin to the NE and play a role in nuclear positioning in skeletal muscle cells [8–12]. However, a function for MT nucleation from the NE in nuclear positioning has not been established. Using the proximity-dependent biotin identification (BioID) method [13, 14], we found several centrosomal proteins, including Akap450, Pcm1, and Pericentrin, whose association with Nesprin-1 $\alpha$  is increased in differentiated myotubes. We show that Nesprin-1 $\alpha$  recruits Akap450 to the NE independently of kinesin and that Akap450, but not other centrosomal proteins, is required for MT nucleation from the NE. Furthermore, we demonstrate that this mechanism is disrupted in congenital muscular dystrophy patient myotubes carrying a nonsense mutation within the *SYNE1* gene (23560 G>T) encoding Nesprin-1 [15, 16]. Finally, using computer simulation and cell culture systems, we provide evidence for a role of MT nucleation from the NE on nuclear spreading in myotubes. Our data thus reveal a novel function for Nesprin-1 $\alpha$ /Nesprin-1 in nuclear

positioning through recruitment of Akap450-mediated MT nucleation activity to the NE.

## RESULTS AND DISCUSSION

### BioID Screen Identifies Nesprin-1 $\alpha$ -Associated Centrosomal Proteins in Myotubes

During skeletal muscle differentiation, Nesprin-1 expression switches from giant to smaller isoforms, particularly Nesprin-1 $\alpha$  [17, 18]. Using C2C12 myoblasts that differentiate into myotubes upon serum withdrawal [19], we confirmed the upregulation of Nesprin-1 $\alpha$  during myogenic differentiation (Figure 1A). To carry out the biotin identification (BioID) screen [13, 14], mycBirA\* fused to Nesprin-1 $\alpha$  (BioID-Nesprin-1 $\alpha$ ) was stably expressed in C2C12 cells and demonstrated to properly localize to the nuclear envelope (NE) upon doxycycline (DOX) induction (Figures 1B and 1C). BioID-Nesprin-1 $\alpha$  expression was induced in the presence of biotin in proliferating C2C12 myoblasts and differentiated myotubes. Following affinity purification of biotinylated proteins on streptavidin-conjugated beads, we confirmed expression and biotinylation of BioID-Nesprin-1 $\alpha$  and biotinylation of endogenous proteins (Figure S1A). Untreated cells (–DOX –biotin) and cells treated with only biotin (–DOX +biotin) were used as controls. Following tandem mass tag mass spectrometry and normalization to varying bait levels across samples, we identified 446 proteins preferentially associated with Nesprin-1 $\alpha$  in myotubes compared to myoblasts, in at least two out of three experiments (Figure 1D; Data S1). These included known interactors, such as muscle A-kinase anchoring protein (mAkap; Akap6), kinesin light chains 1 and 2 (Klc1/2), and Kif5b [8, 20]. Nesprins, including Nesprin-1 $\alpha$ /Nesprin-1, are anchored to the NE through interaction of its C-terminal KASH (Klarsicht/ANC-1/SYNE homology) domain with inner nuclear membrane SUN (Sad1/UNC-84) domain proteins, Sun1 and

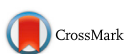

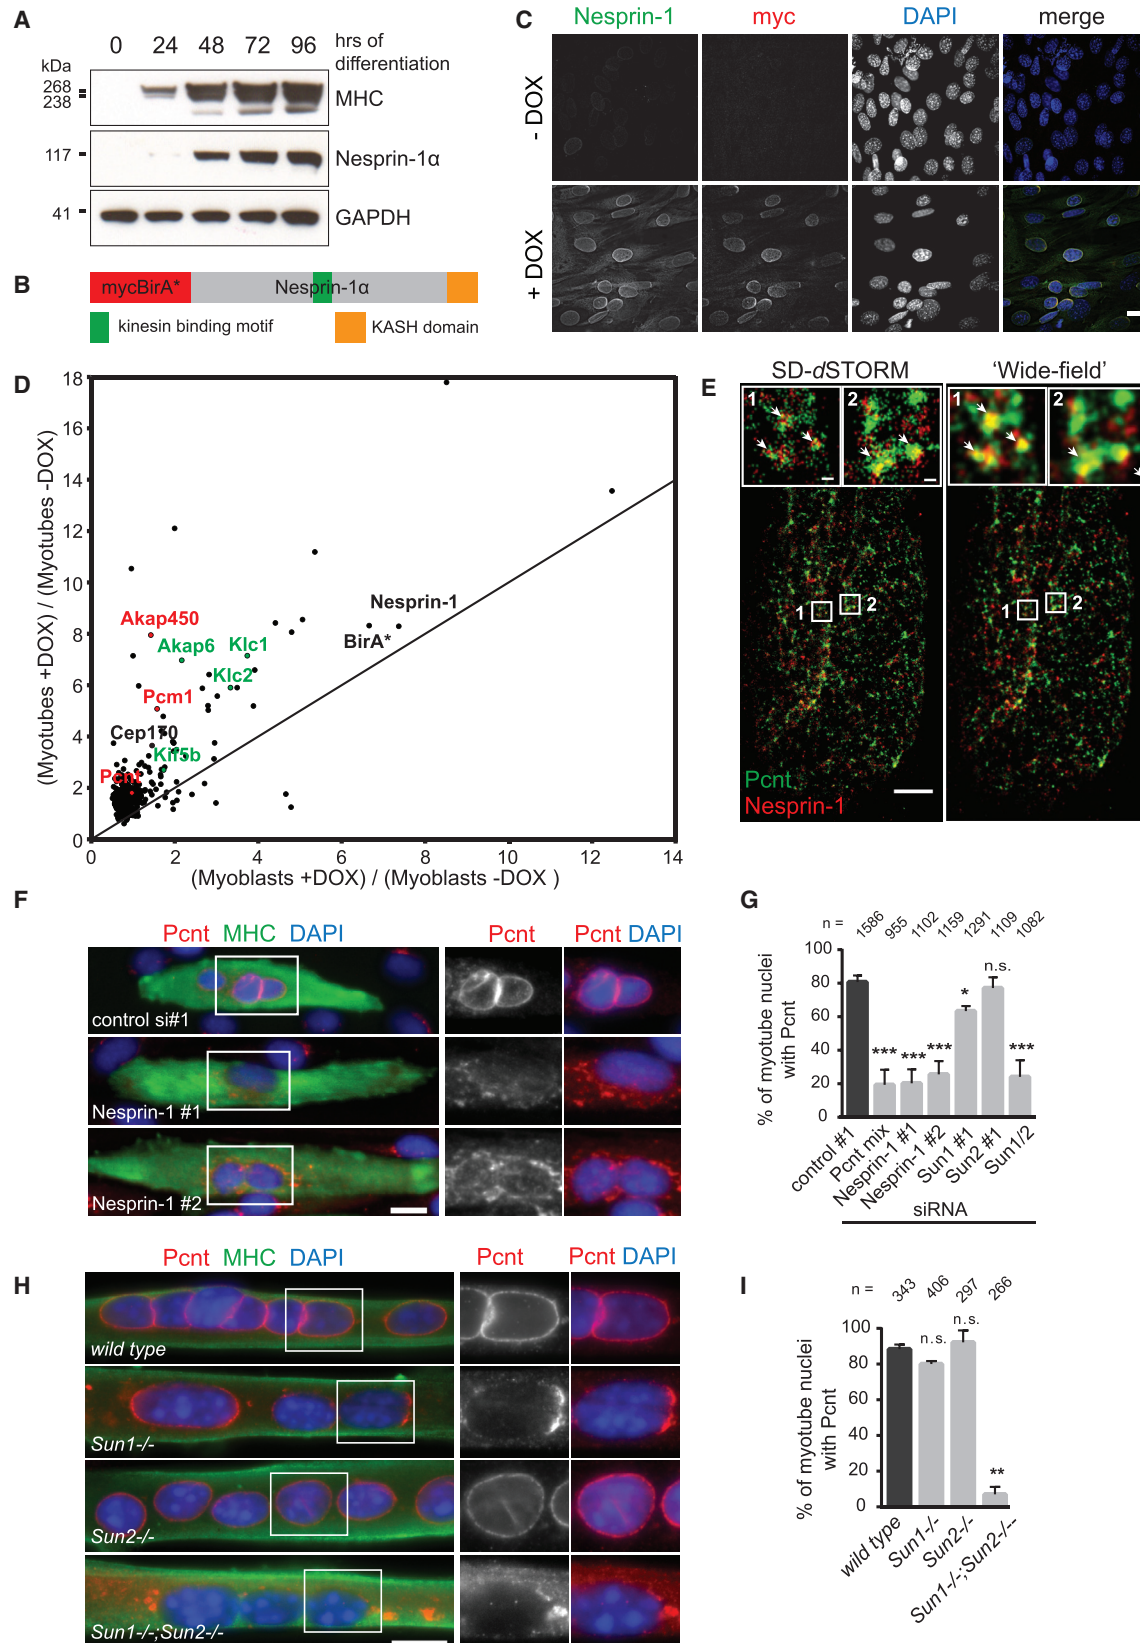

(legend on next page)

Sun2 [21]. We confirmed that Nesprin-1 $\alpha$ /Nesprin-1 localization at the NE depends on Sun1/Sun2 (Figure S1C). In addition, we showed by small interfering RNA (siRNA)-mediated depletion that Klc1/2 localization at the NE depended on Nesprin-1 and both Sun1 and Sun2, as previously reported (Figures S1B–S1D) [8, 22].

Four centrosomal proteins (Akap450, Pcm1, Cep170, and Pericentrin) were preferentially enriched in myotube BioID-Nesprin-1 $\alpha$  samples (Figure 1D; Data S1). Akap450, Pcm1, Pericentrin, Cdk5rap2, and  $\gamma$ -tubulin are centrosomal proteins reported to relocate to the nucleus during skeletal muscle formation [1–3]. Concomitantly, microtubule (MT) nucleation activity is found at the NE, and the MT network itself is dramatically reorganized into dense bundles parallel to the long axis of differentiated myotubes [4, 23, 24]. Depletion of Nesprin-1 was previously reported to result in the loss of Pericentrin, Pcm1, and  $\gamma$ -tubulin from myotube nuclei by an unknown mechanism [5]. Our BioID data led us to hypothesize that the muscle-specific Nesprin-1 $\alpha$  isoform [17] is the elusive molecular receptor for centrosomal proteins and for MT nucleation activity at the NE during skeletal muscle formation. Consistently, Nesprin-1 $\alpha$ /Nesprin-1 and Pericentrin were found in close proximity at the NE of differentiated C2C12 myoblasts in spectral demixing direct stochastic optical reconstruction microscopy (SD-dSTORM) [25, 26] with a lateral resolution of 20–35 nm (Figure 1E; SD-dSTORM, insets). Note that the signals for Nesprin-1 $\alpha$ /Nesprin-1 and Pericentrin overlap when the SD-dSTORM data are rendered at the approximate resolution of a conventional wide-field microscope (Figure 1E; wide-field, insets).

### Nesprin-1 $\alpha$ /Nesprin-1 Recruits Centrosomal Proteins to the NE Independently of Its Kinesin-1-Binding Domain

We next depleted Nesprin-1 $\alpha$ /Nesprin-1 in C2C12 myoblasts (Figure S2B) and analyzed Pericentrin localization in myotubes. As expected, Pericentrin was absent from the NE and dispersed within the cytoplasm in Nesprin-1-depleted myotubes (Figure 1F), with the loss of NE Pericentrin being similar to Pericentrin depletion (Figures 1G, S2A, and S2C). Protein levels of Pericentrin

were unaffected by Nesprin-1 depletion during myogenic differentiation (Figure S2F). Pericentrin and Akap450 were also absent from the NE of a CRISPR/Cas9-edited clonal C2C12 cell line lacking NE-associated Nesprin-1 (Figures 2E, 2F, S2H, and S2I; –DOX samples). Curiously, the centriole protein Cep170 [27] that we also identified to be enriched in myotube BioID-Nesprin-1 $\alpha$  samples localized to the NE even in the absence of Nesprin-1 (Figure S1E), suggesting that Nesprin-1-dependent and independent mechanisms might be involved in recruitment of centrosomal proteins to the NE.

Following co-depletion of Sun1 and Sun2, the percentage of nuclei showing Pericentrin at the NE was reduced to a similar extent as for Nesprin-1 or Pericentrin knockdown (Figures 1G, S2A, S2D, and S2E). Sun1 depletion alone somewhat reduced Pericentrin at the NE, whereas Sun2 depletion showed no effect (Figures 1G and S2A). Consistent with our RNAi data, *Sun1*<sup>−/−</sup>;*Sun2*<sup>−/−</sup> mouse primary myoblasts differentiated to myotubes *in vitro* lacked Pericentrin at the NE; instead, Pericentrin was mislocalized to the cytoplasm (Figures 1H and 1I). This agrees with previous results demonstrating that only loss of both Sun1 and Sun2 affects Nesprin-1 nuclear localization in skeletal muscle [28]. However, *Sun1*<sup>−/−</sup> myotubes appeared to have less Pericentrin at the NE than *Sun2*<sup>−/−</sup> or wild-type myotubes, indicating that Sun1 might be the dominant SUN domain protein involved in Pericentrin NE recruitment during myogenic differentiation. Overall, we conclude that linker of nucleoskeleton and cytoskeleton (LINC) complexes comprising Nesprin-1 $\alpha$ /Nesprin-1 and Sun1/2 are required for Pericentrin recruitment to the NE in myotubes.

Several NE proteins, including LINC complex components, are mutated in striated muscle diseases, like Emery-Dreifuss muscular dystrophy (EDMD) [29–33]. Recently, a homozygous nonsense mutation within the *SYNE1* gene (23560 G>T) that encodes Nesprin-1 was identified in a congenital muscular dystrophy (CMD) patient [16], resulting in decreased mRNA expression of both Nesprin-1 giant and Nesprin-1 $\alpha$  [15]. We asked whether this premature stop mutation within *SYNE1* affected NE localization of centrosomal proteins. First, we confirmed

### Figure 1. LINC Complex Comprising Nesprin-1 and Sun1/Sun2 Is Required for NE Localization of Centrosomal Proteins during Myogenic Differentiation

(A) C2C12 myoblasts were differentiated by serum starvation for the indicated time points (hours of differentiation). Cell lysates were analyzed by western blot using antibodies against myosin heavy chain (MHC), Nesprin-1 $\alpha$  (MANNES1E monoclonal antibody [mAb]), and GAPDH.

(B) Schematic of Nesprin-1 $\alpha$  fused to myc-BirA\* (BioID-Nesprin-1 $\alpha$ ) for BioID.

(C) Non-differentiated C2C12 cells stably expressing doxycycline-inducible myc-BirA\*-Nesprin-1 $\alpha$  were treated with (+DOX) or without (–DOX) doxycycline, fixed and stained for Nesprin-1 (green, clone 9F10), myc (red), or nuclei (DAPI, blue). The scale bar represents 20  $\mu$ m.

(D) Depicted are normalized quantities of proteins purified on streptavidin beads in BioID-Nesprin-1 $\alpha$ -expressing C2C12 myotubes (y axis) and myoblasts (x axis) treated with biotin. Each protein quantity is the ratio of the amount of a protein in cells treated with doxycycline (+DOX) to the amount from untreated cells (–DOX), as determined by tandem mass tag mass spectrometry following streptavidin affinity purification. Proteins in green are previously described binding partners of Nesprin-1, whereas proteins in red are known centrosomal proteins investigated in this study. See also Figure S1 and Data S1.

(E) Dual-color SD-dSTORM image of Pericentrin (Pcnt, green) and Nesprin-1 (red, MANNES1E) [15, 18] at the nuclear surface of a differentiated C2C12 myoblast (left) and the same SD-dSTORM image rendered to the resolution of a conventional wide-field microscope (right). Insets show higher magnifications of colocalization regions (arrows). The scale bar represents 1  $\mu$ m. The scale bar of insets represents 100 nm.

(F) Representative epi-fluorescence images of 48 hr differentiated C2C12 myotubes, transfected with the indicated siRNAs. Cells were stained for Pericentrin (Pcnt, red), nuclei (DAPI, blue), and myosin heavy chain (MHC, green) to identify myotubes. The scale bar represents 20  $\mu$ m. See also Figures S2A–S2F.

(G) Quantification of Pericentrin recruitment to the NE in myotube nuclei after treatment with the indicated siRNAs. Error bars  $\pm$  SD; n represents total number of nuclei from at least three independent experiments. \*\*\*p < 0.001; \*p < 0.05; n.s., not statistically significant; t test.

(H) Representative epi-fluorescence images of 72 hr differentiated primary myotubes from wild-type, *Sun1*<sup>−/−</sup>, *Sun2*<sup>−/−</sup>, or *Sun1*<sup>−/−</sup>;*Sun2*<sup>−/−</sup> knockout mice, stained for Pericentrin (Pcnt, red), MHC (green), and nuclei (DAPI, blue). The scale bar represents 20  $\mu$ m.

(I) Quantification of Pericentrin recruitment to the NE as shown in (H). Error bars  $\pm$  SD; n represents total number of nuclei from two independent experiments. \*\*p < 0.01; n.s., not statistically significant, t test.



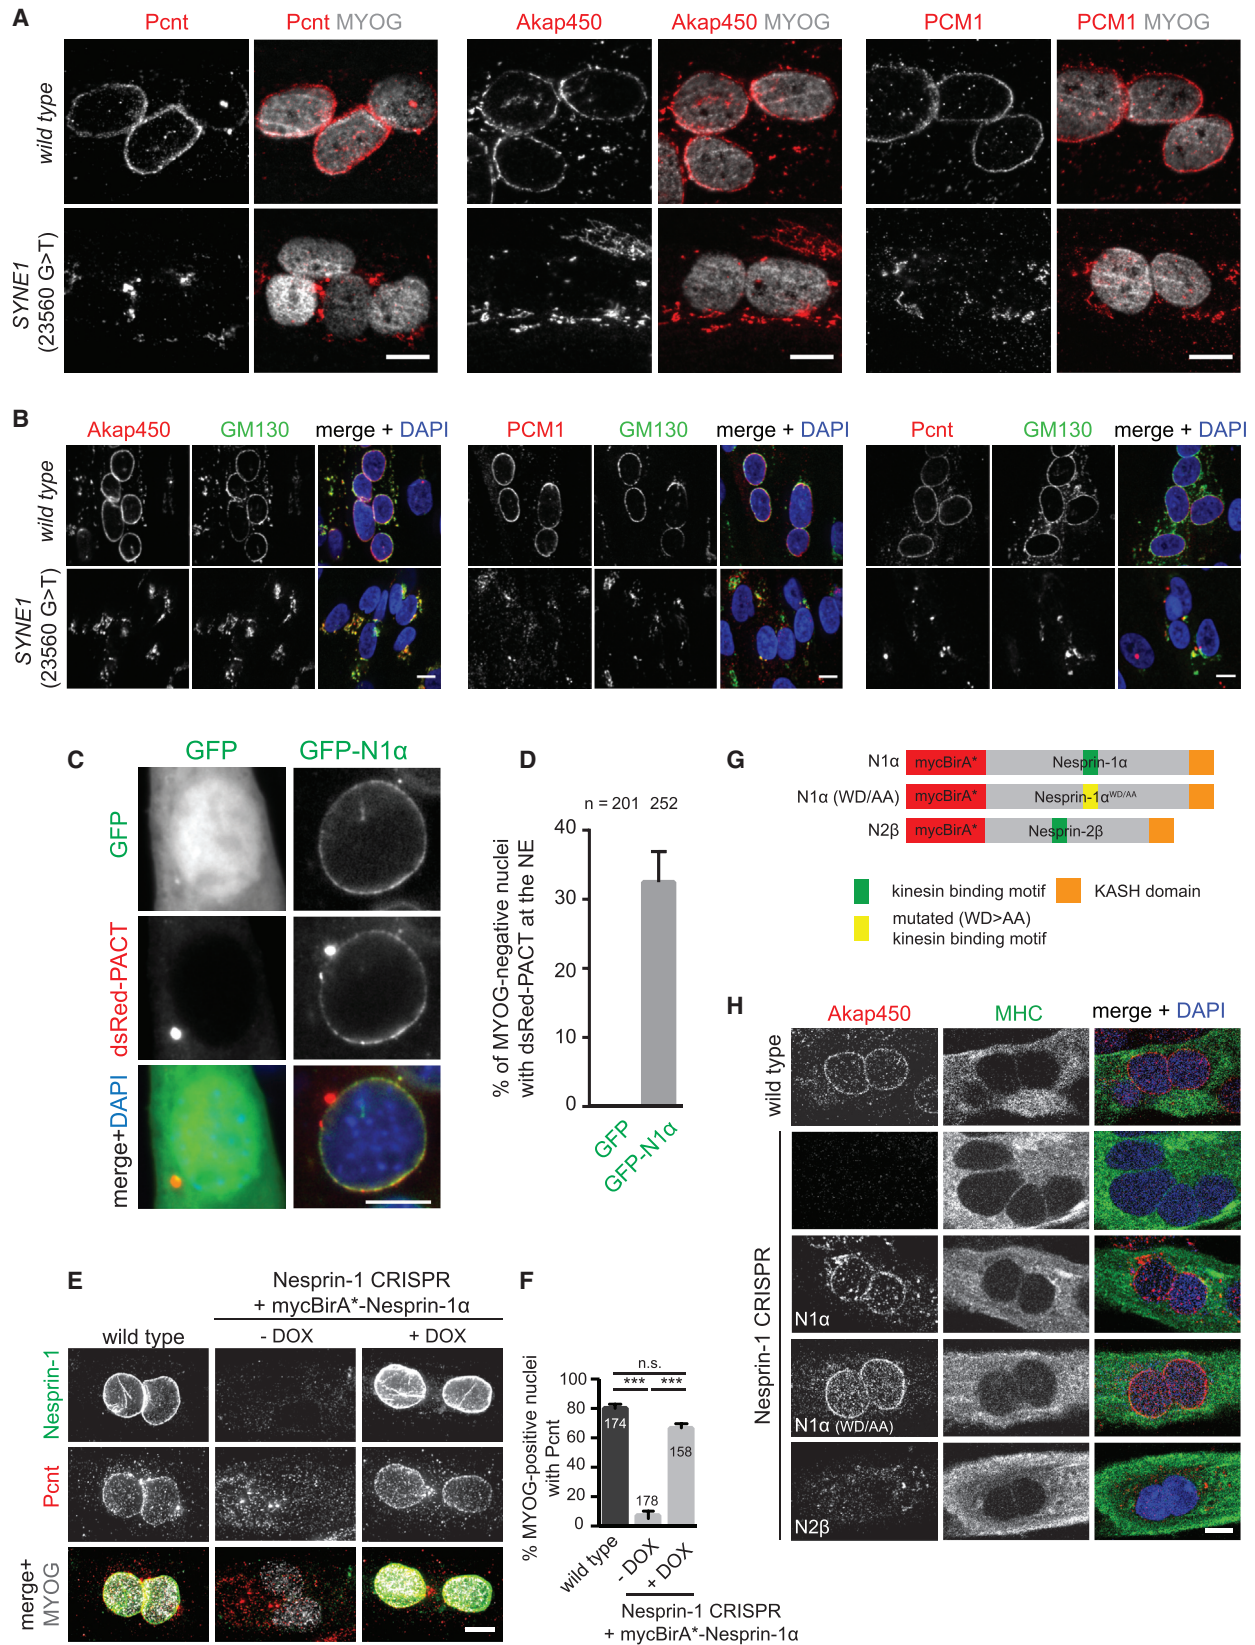

(legend on next page)

that Nesprin-1 isoforms were absent from the NE of immortalized myotubes from this CMD patient (*SYNE1* [23560 G>T]) but were present in a healthy control (Figure S2G). Next, we found that Pericentrin, Akap450, PCM1, and the *cis*-Golgi marker protein GM130 colocalized at the NE of healthy control myotubes (Figures 2A and 2B). In contrast, these centrosomal proteins were mislocalized to the cytoplasm in *SYNE1* (23560 G>T) patient myotubes, where they often concentrated at perinuclear regions together with mislocalized GM130-positive Golgi fragments. These results indicate that the aggregates of centrosomal proteins observed in Nesprin-1-depleted cells are retained at perinuclear Golgi complex fragments.

We next sought to ascertain whether the Nesprin-1 $\alpha$  isoform was sufficient to recruit centrosomal proteins to the NE in non-differentiated cells via heterologous expression of Nesprin-1 $\alpha$  and the Pericentrin-Akap450 centrosomal targeting (PACT) domain [34]. Non-differentiated C2C12 myoblasts were co-transfected with dsRed-PACT and GFP-Nesprin-1 $\alpha$  or GFP. Only non-differentiated myoblasts (negative for Myogenin; not shown) were examined. Remarkably, dsRed-PACT was recruited to the NE in addition to the centrosome in about 30% of GFP-Nesprin-1 $\alpha$ -expressing C2C12 cells but never found at the NE of GFP-expressing cells (Figures 2C and 2D). These data suggest that Nesprin-1 $\alpha$  can already induce NE localization of centrosomal proteins in non-differentiated cells but that additional factors might be required to trigger the full recruitment process during myogenic differentiation. To determine whether Nesprin-1 $\alpha$  is truly sufficient for NE localization of centrosomal proteins in differentiated myotubes, we transduced the C2C12 cell line lacking NE-associated Nesprin-1 with the same doxycycline-inducible mycBirA\*-Nesprin-1 $\alpha$  construct used in the BioID experiments (Figure 1B) and examined Myogenin-positive cells for localization of Pericentrin and Akap450. Without doxycycline, Pericentrin and Akap450 were found within the cytoplasm in differentiated mycBirA\*-Nesprin-1 $\alpha$ -transduced CRISPR cells (Figures 2E, 2F, S2H, and S2I). Induction of NE-localized mycBirA\*-Nesprin-1 $\alpha$  by doxycycline led to recruitment of Pericentrin and Akap450 to the NE. Following washout of doxycycline, mycBirA\*-Nesprin-1 $\alpha$  and Pericentrin were concomitantly lost from the NE after 5–7 days (Figure S2J). These data strongly suggest that Nesprin-1 $\alpha$  is necessary and sufficient for NE localization of a subset of centrosomal proteins during skeletal muscle

formation. Whether Nesprin-1 $\alpha$  fulfils this function exclusively would require more comprehensive testing of the multitude of KASH-containing Nesprin isoforms [17, 35]. These results also demonstrate that mycBirA\*-Nesprin-1 $\alpha$  used in the BioID experiments is biologically functional, thus strengthening our confidence in the physiological relevance of the BioID results.

Kinesin-1 is recruited to the NE via interaction with the LEWD kinesin-binding motif of Nesprin-1/Nesprin-2, and a WD/AA mutation in this domain disrupts the Nesprin-kinesin-1 interaction [8]. We set out to determine whether this domain was involved in the recruitment of Akap450 to the NE. We found that both wild-type and mutated Nesprin-1 $\alpha$  (WD/AA) were competent to recruit Akap450 to the NE, when Nesprin-1 CRISPR myotubes were transduced with the respective doxycycline-inducible mycBirA\*-tagged Nesprin-1 $\alpha$  or Nesprin-1 $\alpha$  (WD/AA) constructs (Figures 2G and 2H). In contrast, the paralogous kinesin-binding Nesprin-2 $\beta$ , usually not expressed in C2C12 myotubes [17, 36], was not able to recruit Akap450 to the NE (Figure 2H). As expected, kinesin-1 NE localization was lost in Nesprin-1 CRISPR myotubes (Figure S2K). However, NE localization of kinesin-1 could be rescued upon expression of Nesprin-1 $\alpha$  and Nesprin-2 $\beta$ , but not Nesprin-1 $\alpha$  (WD/AA). Thus, Akap450 recruitment to the NE occurs independently of the kinesin-binding site of Nesprin-1 $\alpha$  and is probably mediated by a region in Nesprin-1 $\alpha$  that is absent in Nesprin-2 $\beta$ .

### Nesprin-1-Containing LINC Complex Recruits Akap450 to Nucleate MTs at the NE

The recruitment of centrosomal proteins to the NE has been proposed to be responsible for MT nucleation from the nucleus in differentiated myoblasts and myotubes [4]. Our data suggest a requirement for LINC complexes in centrosomal protein recruitment to the NE. We thus interrogated which centrosomal components are involved in MT nucleation from the NE. We first used 3D structured illumination microscopy (3D SIM) in differentiated C2C12 myoblasts to show that Pericentrin is localized to the outer nuclear membrane (ONM) close to Nesprin-1 $\alpha$ /Nesprin-1-containing foci from which MTs emanate (Figure 3A). To further explore these sites of MT nucleation, we used nocodazole to depolymerize MTs and then monitored MT regrowth in Myogenin-positive cells after nocodazole washout. Within five minutes, most of control siRNA-treated cells showed MT

### Figure 2. The Muscle-Specific Nesprin-1 $\alpha$ Isoform Is Required for Recruiting Centrosomal Proteins to the Nucleus

(A and B) Representative epi-fluorescence images of differentiated human immortalized myotubes from a healthy control (wild-type) or from a patient carrying a nonsense mutation within the *SYNE1* (23560 G>T) gene immunostained for Pericentrin (Pcnt, red), Akap450 (red), or PCM1 (red) and (A) Myogenin (MYOG, gray) as differentiation marker or (B) the *cis*-Golgi marker GM130 (green) and nuclei (DAPI, blue). The scale bar represents 10  $\mu$ m. See also Figure S2G.

(C) Representative epi-fluorescence images of C2C12 myoblasts transfected with dsRed-PACT and GFP or GFP-Nesprin-1 $\alpha$  (GFP-N1 $\alpha$ ). Cells were stained for nuclei (DAPI, blue) and Myogenin (not shown). The scale bar represents 10  $\mu$ m.

(D) Quantification of dsRed-PACT recruitment to the NE in non-differentiated, Myogenin-negative C2C12 cells expressing GFP or GFP-Nesprin-1 $\alpha$ . Error bars  $\pm$  SD; n represents total number of nuclei from three independent experiments.

(E) C2C12 wild-type or Nesprin-1 CRISPR mutant cells transduced with mycBirA\*-Nesprin-1 $\alpha$  without and with 1  $\mu$ g/mL doxycycline (–/+DOX) were differentiated for 48 hr, fixed, and stained for Nesprin-1 (green, clone 9F10), Pericentrin (Pcnt, red), and Myogenin (MYOG, gray). The scale bar represents 10  $\mu$ m. See also Figures S2H–S2J.

(F) Quantification of Pericentrin recruitment to the NE in Myogenin-(MYOG)-positive nuclei as described in (E). Error bars  $\pm$  SEM; n represents total number of nuclei from three independent experiments. \*\*\*p < 0.001; n.s., not statistically significant, Tukey's multiple comparisons test following one-way ANOVA.

(G) Schematic representation of the different myc-BirA\*-Nesprin constructs used for the experiments shown in (H).

(H) C2C12 wild-type, untransduced Nesprin-1 CRISPR mutant cells or CRISPR mutant cells transduced with mycBirA\*-Nesprin-1 $\alpha$  (N1 $\alpha$ ), mycBirA\*-Nesprin-1 $\alpha$  with the LEWD motif mutated to LEAA (N1 $\alpha$  [WD/AA]), or mycBirA\*-Nesprin-2 $\beta$  (N2 $\beta$ ) were incubated with doxycycline and differentiated for 48 hr, fixed, and stained for myosin heavy chain (MHC, green), Akap450 (red), and nuclei (DAPI, blue). The scale bar represents 10  $\mu$ m. See also Figure S2K.



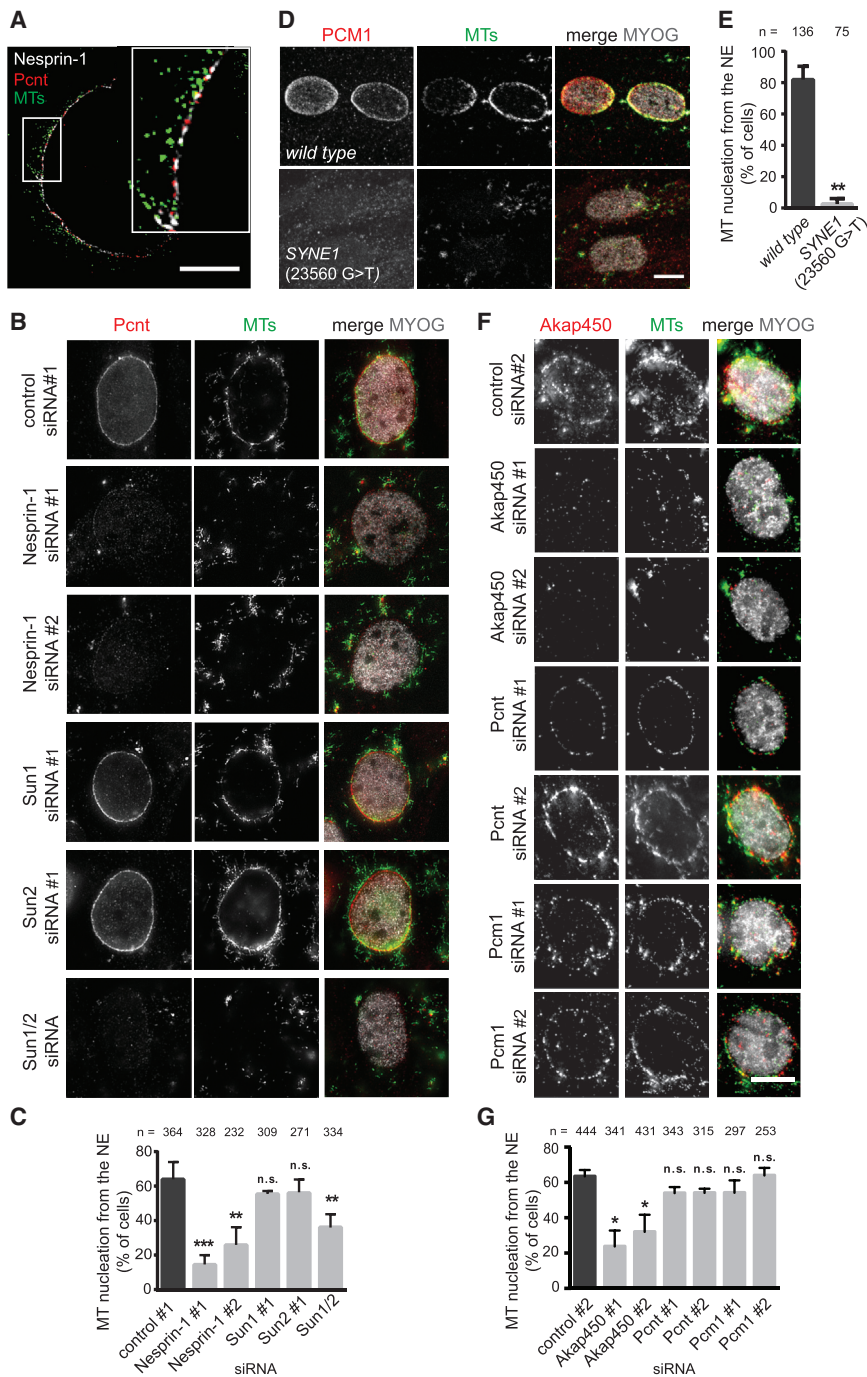

### Figure 3. MT Nucleation from the NE Requires Nesprin-1, Sun1/2, and Akap450

(A) 3D-SIM fluorescent image of the nucleus of a differentiated C2C12 cell, stained for Nesprin-1 (white, MANNES1E), Pericentrin (Pcnt, red), and microtubules (MTs, green) after 5 min nocodazole washout to allow MT regrowth. The scale bar represents 5  $\mu$ m.

(B) 48 hr differentiated C2C12 cells, treated with the indicated siRNAs, were immunostained for Pericentrin (Pcnt, red), microtubules (MTs, green) and Myogenin (MYOG, gray) after nocodazole washout. The scale bar represents 10  $\mu$ m. See also Figure S3A.

(C) Quantification of the mean percentage (%) of Myogenin-positive cells with MT nucleation from the NE as described in (B). Error bars  $\pm$  SD; n represents total number of nuclei from at least three independent experiments. \*\*\* $p$  < 0.001; \*\* $p$  < 0.01; n.s., not statistically significant, t test.

(D) Differentiated human immortalized myotubes from a healthy control (wild-type) or from a patient carrying a nonsense mutation within the SYNE1 gene (23560 G>T) were immunostained for PCM1 (red), microtubules (MTs, green) and Myogenin (MYOG, gray) after nocodazole washout. Images represent maximum projections of confocal z sections. The scale bar represents 10  $\mu$ m. See also Figures S3B and S3C.

(E) Quantification of the mean percentage (%) of Myogenin-positive cells with MT nucleation from the NE as described in (D). Error bars  $\pm$  SD; n represents total number of nuclei from two independent experiments. \*\* $p$  < 0.01; t test.

(F) 48 hr differentiated C2C12 cells, treated with the indicated siRNAs were immunostained for Akap450 (red), microtubules (MTs, green) and Myogenin (MYOG, gray) after nocodazole washout. The scale bar represents 10  $\mu$ m.

(G) Graph shows the mean percentage (%) of Myogenin-positive cells with MT nucleation from the NE as described in (F). Error bars  $\pm$  SEM; n represents total number of nuclei from two independent experiments. \* $p$  < 0.05; n.s., not statistically significant, one-way ANOVA with Dunnett's multiple comparisons test.

regrowth from the NE (Figures 3B and 3C). Additionally, we noticed MT regrowth from Pericentrin-positive seeds within the cytoplasm. In cells transfected with Nesprin-1 siRNA, we observed a strong reduction in MT regrowth from the NE, whereas MTs still regrew from Pericentrin-positive cytoplasmic seeds. In the absence of both Sun1/2, we also detected a reduction of MT regrowth from the NE, whereas depletion of Sun1 or Sun2 alone had little or no effect on regrowth. None of these siRNA-mediated depletions had an effect on the longitudinal MT array in untreated differentiated myoblasts when compared

to control siRNA conditions (Figure S3A, untreated). Moreover, we confirmed that, in the presence of nocodazole, MTs were completely depolymerized and Pericentrin localization was unaffected after nocodazole treatment in all conditions (Figure S3A, nocodazole). Taken together, these results confirm that LINC complexes are required for MT nucleation from the NE, but not for the longitudinal alignment of MTs.

To corroborate these findings, we examined MT nucleation from the NE using the same MT regrowth assay in SYNE1 (23560 G>T) patient cells. Wild-type myotubes predominantly nucleated MTs from the NE but also from minor PCM1- or Akap450-positive seeds in the cytoplasm (Figures 3D, 3E, and 4A). In contrast, in almost all SYNE1 (23560 G>T) patient myotubes, all MT nucleation involved PCM1- or Akap450-positive

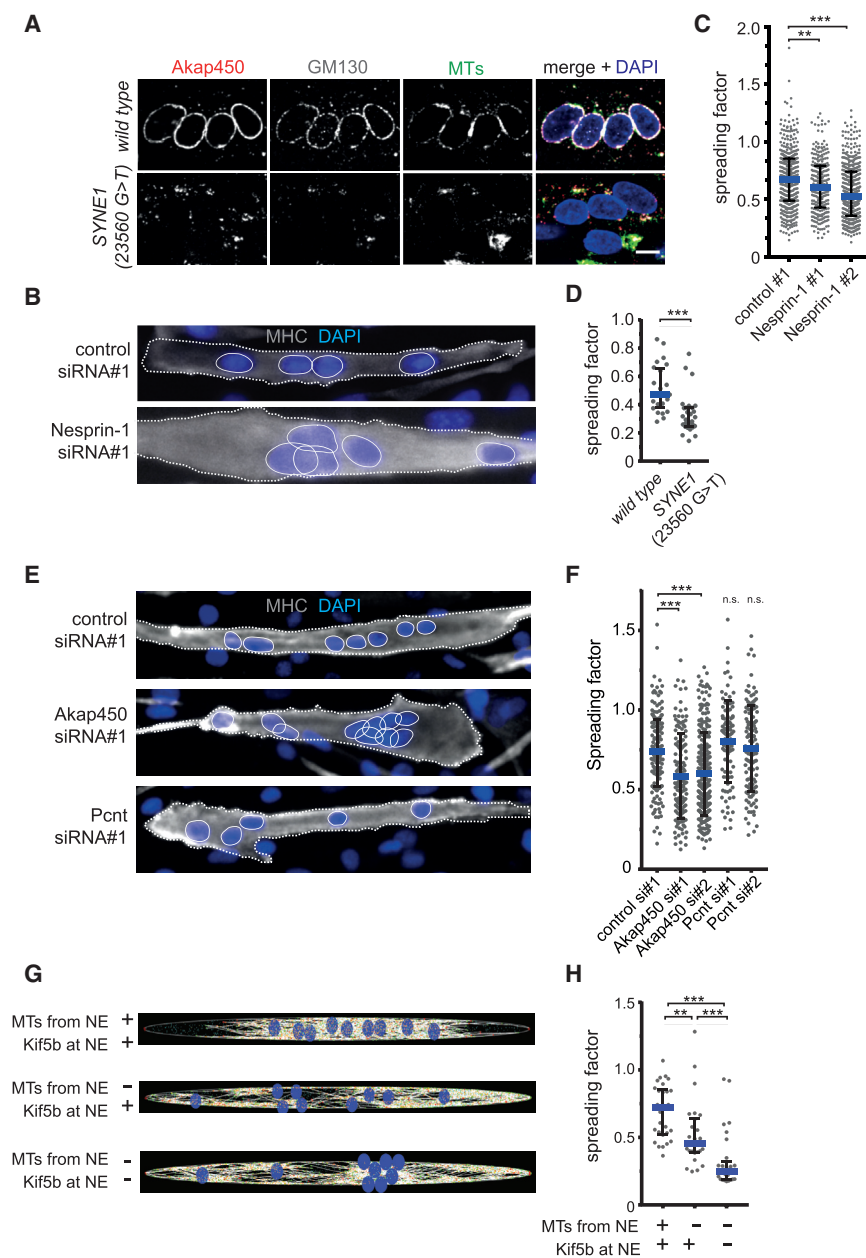

### Figure 4. Microtubule Nucleation from the Nucleus Is Required for Proper Nuclear Positioning

(A) Differentiated human immortalized myotubes from a healthy control (wild-type) or from a patient carrying a nonsense mutation within the *SYNE1* (23560 G>T) gene were immunostained with Akap450 (red), GM130 (gray), microtubules (MTs, green), and nuclei (DAPI, blue) following nocodazole washout. The scale bar represents 10  $\mu$ m. See also [Figure S4A](#).

(B) C2C12 cells were transfected with the indicated siRNAs, differentiated for 48 hr, and stained for nuclei (DAPI, blue) and myosin heavy chain (MHC, white). Myotube outlines are marked by dashed lines, and nuclei are encircled.

(C) Spreading factor analysis of nuclei in C2C12 myotubes as shown in (B) and for cells transfected with Nesprin-1 siRNA no. 2. Results are depicted as mean (blue line) with interquartile range (black bars) from three independent experiments. \*\*\* $p < 0.001$ ; \*\* $p < 0.01$ ; Mann-Whitney test.

(D) Spreading factor analysis of nuclei in differentiated human immortalized myotubes from a healthy control (wild-type) or *SYNE1* (23560 G>T) patient cells. Results are depicted as mean (blue line) with interquartile range (black bars) from two independent experiments. \*\*\* $p < 0.001$ ; Mann-Whitney test. See also [Movie S1](#).

(E) C2C12 cells were transfected with the indicated siRNAs, differentiated for 48 hr, and stained for nuclei (DAPI, blue) and myosin heavy chain (MHC, white). Myotube outlines are marked by dashed lines, and nuclei are encircled.

(F) Spreading factor analysis of nuclei in C2C12 myotubes shown in (E) and for myotubes transfected with Akap450 siRNA no. 2 and Pcnt (Pericentrin) siRNA no. 2. Results are depicted as mean (blue line) with interquartile range (black bars) from four independent experiments. \*\*\* $p < 0.001$ ; n.s., not statistically significant, Mann-Whitney test.

(G) Snapshots of myotubes simulated with Cytosim. Nuclei are blue, and MTs in white. Three conditions are shown from top to bottom, with (+) and without (-) MTs nucleated from the NE and  $\pm$ Kif5b anchored at the NE, as indicated. \*\*\* $p < 0.001$ ; Mann-Whitney test. See also [Movie S2](#) and [Figures S4B–S4D](#).

(H) Spreading factor analysis of nuclei in simulated myotubes as shown in (G). Results are depicted as mean (blue line) with interquartile range (black bars). \*\*\* $p < 0.001$ ; \*\* $p < 0.01$ ; Mann-Whitney test. See also [Figure S4E](#).

seeds within the cytoplasm with little or no MT regrowth occurring from the NE. Nevertheless, myotubes from *SYNE1* (23560 G>T) patient cells continued to maintain longitudinal MT arrays, comparable to those observed in wild-type myotubes ([Figure S3B](#), untreated). Additionally, treatment of wild-type or *SYNE1* (23560 G>T) cells with nocodazole completely depolymerized MTs with little effect on PCM1 distribution, be it NE-associated or cytoplasmic ([Figure S3B](#), nocodazole). *SYNE1* (23560 G>T) patient myotubes only displayed MT nucleation defects but no obvious disorganization of the actin cytoskeleton, consistent with Nesprin-1 $\alpha$  lacking the N-terminal actin-binding domain of Nesprin-1 giant ([Figure S3C](#)). Taken together, these results imply that Nesprin-1 occupies a central

position in MT nucleation from the NE, most likely via the recruitment of key centrosomal components.

The identity of this key MT-nucleating component at the NE is currently unknown. Our BioID experiments identified two centrosomal proteins, Pericentrin and Akap450, which are known to be involved in MT nucleation at the centrosome through the recruitment of  $\gamma$ -tubulin ring complexes ( $\gamma$ -TuRCs) [37, 38]. We also identified Pcm1, which is thought to indirectly impact on MT organization through the recruitment of other proteins to the centrosome [39]. To determine whether any of these proteins is required for MT nucleation from the NE, MT regrowth experiments were carried out following depletion of Pericentrin, Akap450, or Pcm1 using two different siRNAs targeting each



of the mRNAs. In cells treated with Pericentrin or Pcm1 siRNA, MTs regrew from nuclei to a similar extent as observed for control siRNA-treated cells (60% of Myogenin-positive cells). In contrast, in cells treated with Akap450 siRNA, MTs regrew from less than 30% of Myogenin-positive nuclei (Figures 3F and 3G). These data suggest that Akap450, but not Pericentrin, is the dominant receptor for MT-nucleating  $\gamma$ -TuRC complexes at the NE. Consistently, in myofibers isolated from mouse skeletal muscle, Akap450 remained exclusively at the NE, whereas Pericentrin was also found at MT-nucleating Golgi elements [40].

To elucidate the role of centrosomal proteins on the recruitment of other centrosomal proteins, we depleted Akap450, Pericentrin, Pcm1, and Cdk5rap2 (another pericentriolar material protein) [41] using specific siRNAs and examined their NE localization (Figure S4A). We found that depletion of Pericentrin, Pcm1, and Cdk5rap2 did not affect NE localization of Akap450. Pcm1 also localized to the NE independently of the other centrosomal proteins studied here. In contrast, Pericentrin NE localization was partially reduced by Pcm1 depletion as previously shown [5, 39]. Consistent with previous findings at the centrosome, Cdk5rap2 localization depended on Pericentrin [42–44]. These results further support the unique role of Akap450 on MT nucleation from the NE and suggest that the recruitment of a subset of centrosomal proteins requires interdependent interactions.

### MT Nucleation from the Nucleus Is Necessary for Proper Nuclear Positioning

Correct nuclear positioning is important for muscle function, and mislocalized nuclei are often associated with muscular diseases [45–47]. The MT network, MT motor proteins, and MT-associated proteins (MAPs) have been implicated in nuclear positioning during skeletal muscle formation [8, 22, 46–48]. Furthermore, Nesprin-1 was reported to be involved in the distribution of skeletal muscle nuclei through the recruitment of kinesin-1 motor proteins to the NE *in vivo* and *in vitro* [8–12, 49]. However, it is unknown whether MT nucleation from the NE is also important for nuclear positioning. To confirm the role of Nesprin-1 in nuclear positioning [8], we differentiated C2C12 cells treated with control or Nesprin-1-targeting siRNAs and determined the nuclear distribution along myotubes by calculating the nuclear spreading factor (SF), defined as the ratio between the observed and the maximal theoretical average distance between nuclei according to the myotube length. Nuclei in Nesprin-1-depleted myotubes were less spread throughout the myotube when compared to control myotubes (Figures 4B and 4C). Similarly, we observed a reduction of nuclear spreading in SYNE1 (23560 G>T) patient myotubes when compared to wild-type myotubes (Figure 4D; Movie S1). If MT nucleation from the NE is required for nuclear positioning, then removing Akap450 should also induce nuclear clustering in myotubes. Consistently, depletion of Akap450, but not Pericentrin significantly reduced the SF (Figures 4E and 4F). These results strongly support the hypothesis that Nesprin-1-mediated MT nucleation from the NE via Akap450 is required for nuclear positioning in myotubes.

To determine the role of MT nucleation from the NE on nuclear positioning, we developed a computational model of nuclear movement in myotubes, using the cytoskeleton simulation en-

gine Cytosim [50]. All simulation parameters were set using measured values when possible or varied within reasonable ranges (Table S1; Figures S4B–S4D). Briefly (see STAR Methods for details), in control situations, nuclei featured MT-nucleating complexes at the NE and MT plus-end (Kif5b) and MT minus-end (dynein) directed motor proteins. Moreover, we incorporated MAP4 and the Kif5b-MAP7 complex within the myotube cytoplasm to accomplish anti-parallel MT organization and sliding [47, 51]. Using these minimal settings, we simulated nuclear movements within *in silico* myotubes and observed that nuclei moved dynamically and became evenly dispersed along their long axes. These movements *in silico* recapitulated those observed in cultured myotubes (Figures 4G, 4H, and S4E; Movie S2). Next, we removed MT nucleation activity from the NE and added it to centrosome-like structures randomly positioned in the cytoplasm, as observed in Nesprin-1-depleted myotubes *in vitro*. No other features were changed, including the NE localization of the plus-end motors (Kif5b). In this situation, nuclei clustered in the middle of the myotube or in small groups throughout the myotube, leading to a significantly decreased SF (Figures 4G, 4H, and S4E; Movie S2). Finally, we simulated nuclear distribution in myotubes where we removed both MT nucleation activity and plus-end motors (Kif5b) from the NE. We found that nuclei further clustered together and the SF was decreased even more, when compared to removal of MT nucleation alone (Figures 4G, 4H, and S4E; Movie S2). Thus, Nesprin-1-mediated MT nucleation from the NE via Akap450 has a role in nuclear positioning in myotubes independent of the recruitment of plus-end motor proteins to the NE. However, only the combined action of Nesprin-1-mediated MT nucleation and Kif5b/kinesin-1 recruitment to the nucleus seems to result in proper nuclear positioning in myotubes.

In this work, we identified the muscle-specific Nesprin-1 $\alpha$  isoform to be required for the recruitment of several centrosomal proteins to the NE during skeletal muscle formation. Among the recruited centrosomal proteins, only Akap450 was involved in regulating MT nucleation from the NE. Our modeling and Akap450 depletion experiments indicated that MT nucleation is required for proper nuclear positioning in addition to NE-localized kinesin-1 motor protein activity. The finding that Akap450 recruitment is independent of kinesin-1 NE localization raises the intriguing possibility of synergistic coordination of MT nucleation with MT motor activity on individual Nesprin-1 $\alpha$ /Nesprin-1 molecules to facilitate efficient nuclear positioning. Future work will address whether these two different Nesprin-1 activities work within the same LINC complex containing Nesprin-1 $\alpha$  and Sun1/2 or whether this activity is segregated.

### STAR★METHODS

Detailed methods are provided in the online version of this paper and include the following:

- KEY RESOURCES TABLE
- CONTACT FOR REAGENT AND RESOURCE SHARING
- EXPERIMENTAL MODEL AND SUBJECT DETAILS
  - Cell lines and culture
  - Mouse strains and primary myoblasts

## METHOD DETAILS

- Antibodies
- siRNA/DNA transfection
- Plasmids
- Co-transfection of plasmids
- Nesprin-1 monoclonal antibody production
- BioID proteomics
- Mass spectrometry
- Mass spectrometry data processing
- MT re-growth assay
- Immunofluorescence
- Imaging
- SD-dSTORM
- Structured illumination microscopy (SIM)
- SDS-PAGE and Western Blot analysis
- Computer simulation
- Experimental Design

## QUANTIFICATION AND STATISTICAL ANALYSIS

- Quantification centrosomal proteins at the NE
- Quantification MT re-growth
- Quantification dsRed-PACT at the NE
- Statistical Analysis

## DATA AND SOFTWARE AVAILABILITY

## SUPPLEMENTAL INFORMATION

Supplemental Information includes four figures, two tables, two movies, and one data file and can be found with this article online at <http://dx.doi.org/10.1016/j.cub.2017.08.031>.

## AUTHOR CONTRIBUTIONS

P.G., Y.L.L., B.B., B.C., and E.R.G. conceived and designed experiments; P.G., Y.L.L., R.M.S., V.K., and R.P. performed experiments and analyzed data; B.C. performed computational analysis; A.C., K.M., F.N., and J.S. provided resources; P.G. wrote the manuscript; P.G., Y.L.L., B.B., B.C., and E.R.G. revised the manuscript; and S.S., J.S., B.B., B.C., and E.R.G. supervised the project.

## ACKNOWLEDGMENTS

We thank Xiaoqian Ye, Martina Maric, and Ruth Jinfen Chai for producing the 9F10 monoclonal antibody; Ei Leen Leong for Nesprin-1 CRISPR plasmids; and Singapore Immunology Network FACS facility for assistance with FACS. We acknowledge the Advanced Medical Bioimaging Core Facility (AMBIO) at the Charité Berlin and the Institute of Medical Biology Microscopy Unit in Singapore for microscope assistance and the Platform for immortalization of Human Cells at the Institute de Myologie, Paris for the generation of immortalized human myoblasts. We thank Markus Schülke for hosting P.G. in his lab in Berlin and Andreas Merdes for sharing unpublished data and comments on the manuscript. We furthermore thank Sean Munro, Kunsoo Rhee, Scott T. Brady, and Glenn E. Morris for providing us the dsRed-PACT plasmid, the Pericentrin, the Klc1/2, and the Nesprin-1 antibody (MANNES1E and MANNES1A), respectively. This work was supported through the International Research Training Group in Myology—MyoGrad (DFG GK1631), the French-German University (UFA-DFH) (CT-46-14-II), and the Fondation pour la Recherche Médicale (FRM) (FDT20160435051) to P.G. This work was further funded by Agence Nationale pour la Recherche (ANR-14-CE09-0006-04) to B.C.; Association Institut de Myologie to B.C. and E.R.G.; the Merlion Project (6.06.14) to B.C. and B.B.; Singapore Agency for Science, Technology and Research (A\*STAR) Biomedical Research Council (BMRC) to B.B. (in part through the GODAFIT SPF) (SPF2012/005) and R.M.S. (in part through the BMRC Young Investigator Grant); the European Research Council (617676), LISBOA-01-0145-FEDER-007391 co-funded by FEDER through POR Lisboa 2020—Pro-

grama Operacional Regional de Lisboa, PORTUGAL 2020 and Fundação para a Ciência e a Tecnologia, and European Molecular Biology Organization to E.R.G.; and the German Research Foundation (DFG) (SFB958/Z02) to J.S.

Received: June 22, 2017

Revised: August 8, 2017

Accepted: August 15, 2017

Published: September 28, 2017

## REFERENCES

1. Bugnard, E., Zaal, K.J.M., and Ralston, E. (2005). Reorganization of microtubule nucleation during muscle differentiation. *Cell Motil. Cytoskeleton* **60**, 1–13.
2. Fant, X., Srsen, V., Espigat-Georger, A., and Merdes, A. (2009). Nuclei of non-muscle cells bind centrosome proteins upon fusion with differentiating myoblasts. *PLoS ONE* **4**, e8303.
3. Srsen, V., Fant, X., Heald, R., Rabouille, C., and Merdes, A. (2009). Centrosome proteins form an insoluble perinuclear matrix during muscle cell differentiation. *BMC Cell Biol.* **10**, 28.
4. Tassin, A.M., Maro, B., and Bornens, M. (1985). Fate of microtubule-organizing centers during myogenesis in vitro. *J. Cell Biol.* **100**, 35–46.
5. Espigat-Georger, A., Dyachuk, V., Chemin, C., Emorine, L., and Merdes, A. (2016). Nuclear alignment in myotubes requires centrosome proteins recruited by nesprin-1. *J. Cell Sci.* **129**, 4227–4237.
6. Zhang, Q., Ragnauth, C., Greener, M.J., Shanahan, C.M., and Roberts, R.G. (2002). The nesprins are giant actin-binding proteins, orthologous to *Drosophila melanogaster* muscle protein MSP-300. *Genomics* **80**, 473–481.
7. Zhen, Y.-Y., Libotte, T., Munck, M., Noegel, A.A., and Korenbaum, E. (2002). NUANCE, a giant protein connecting the nucleus and actin cytoskeleton. *J. Cell Sci.* **115**, 3207–3222.
8. Wilson, M.H., and Holzbaur, E.L.F. (2015). Nesprins anchor kinesin-1 motors to the nucleus to drive nuclear distribution in muscle cells. *Development* **142**, 218–228.
9. Chapman, M.A., Zhang, J., Banerjee, I., Guo, L.T., Zhang, Z., Shelton, G.D., Ouyang, K., Lieber, R.L., and Chen, J. (2014). Disruption of both nesprin 1 and desmin results in nuclear anchorage defects and fibrosis in skeletal muscle. *Hum. Mol. Genet.* **23**, 5879–5892.
10. Zhang, J., Felder, A., Liu, Y., Guo, L.T., Lange, S., Dalton, N.D., Gu, Y., Peterson, K.L., Mizisin, A.P., Shelton, G.D., et al. (2010). Nesprin 1 is critical for nuclear positioning and anchorage. *Hum. Mol. Genet.* **19**, 329–341.
11. Stroud, M.J., Feng, W., Zhang, J., Veevers, J., Fang, X., Gerace, L., and Chen, J. (2017). Nesprin 1 $\alpha$ 2 is essential for mouse postnatal viability and nuclear positioning in skeletal muscle. *J. Cell Biol.* **216**, 1915–1924.
12. Zhang, X., Xu, R., Zhu, B., Yang, X., Ding, X., Duan, S., Xu, T., Zhuang, Y., and Han, M. (2007). Syne-1 and Syne-2 play crucial roles in myonuclear anchorage and motor neuron innervation. *Development* **134**, 901–908.
13. Roux, K.J., Kim, D.I., Raida, M., and Burke, B. (2012). A promiscuous biotin ligase fusion protein identifies proximal and interacting proteins in mammalian cells. *J. Cell Biol.* **196**, 801–810.
14. Roux, K.J., Kim, D.I., and Burke, B. (2013). BioID: a screen for protein-protein interactions. *Curr. Protoc. Protein Sci.* **74**, Unit 19.23.
15. Holt, I., Duong, N.T., Zhang, Q., Lam, T., Sewry, C.A., Mamchaoui, K., Shanahan, C.M., and Morris, G.E. (2016). Specific localization of nesprin-1 $\alpha$ 2, the short isoform of nesprin-1 with a KASH domain, in developing, fetal and regenerating muscle, using a new monoclonal antibody. *BMC Cell Biol.* **17**, 26.
16. Mamchaoui, K., Trollet, C., Bigot, A., Negroni, E., Chaouch, S., Wolff, A., Kandalla, P.K., Marie, S., Di Santo, J., St Gully, J.L., et al. (2011). Immortalized pathological human myoblasts: towards a universal tool for the study of neuromuscular disorders. *Skelet. Muscle* **1**, 34.

17. Duong, N.T., Morris, G.E., Lam, T., Zhang, Q., Sewry, C.A., Shanahan, C.M., and Holt, I. (2014). Nesprins: tissue-specific expression of epsilon and other short isoforms. *PLoS ONE* 9, e94380.
18. Randles, K.N., Lam, T., Sewry, C.A., Puckelwartz, M., Furling, D., Wehnert, M., McNally, E.M., and Morris, G.E. (2010). Nesprins, but not sun proteins, switch isoforms at the nuclear envelope during muscle development. *Dev. Dyn.* 239, 998–1009.
19. Blau, H.M., Chiu, C.-P., and Webster, C. (1983). Cytoplasmic activation of human nuclear genes in stable heterocaryons. *Cell* 32, 1171–1180.
20. Pare, G.C., Easlick, J.L., Mislow, J.M., McNally, E.M., and Kapiloff, M.S. (2005). Nesprin-1 $\alpha$  contributes to the targeting of mAKAP to the cardiac myocyte nuclear envelope. *Exp. Cell Res.* 303, 388–399.
21. Crisp, M., Liu, Q., Roux, K., Rattner, J.B., Shanahan, C., Burke, B., Stahl, P.D., and Hodzic, D. (2006). Coupling of the nucleus and cytoplasm: role of the LINC complex. *J. Cell Biol.* 172, 41–53.
22. Wilson, M.H., and Holzbaur, E.L.F. (2012). Opposing microtubule motors drive robust nuclear dynamics in developing muscle cells. *J. Cell Sci.* 125, 4158–4169.
23. Warren, R.H. (1974). Microtubular organization in elongating myogenic cells. *J. Cell Biol.* 63, 550–566.
24. Zaal, K.J.M., Reid, E., Mousavi, K., Zhang, T., Mehta, A., Bugnard, E., Sartorelli, V., and Ralston, E. (2011). Who needs microtubules? Myogenic reorganization of MTOC, Golgi complex and ER exit sites persists despite lack of normal microtubule tracks. *PLoS ONE* 6, e29057.
25. Lampe, A., Haucke, V., Sigrist, S.J., Heilemann, M., and Schmoranzler, J. (2012). Multi-colour direct STORM with red emitting carbocyanines. *Biol. Cell* 104, 229–237.
26. Lehmann, M., Lichtner, G., Klentz, H., and Schmoranzler, J. (2016). Novel organic dyes for multicolor localization-based super-resolution microscopy. *J. Biophotonics* 9, 161–170.
27. Guarguaglini, G., Duncan, P.I., Stierhof, Y.D., Holmström, T., Duensing, S., and Nigg, E.A. (2005). The forkhead-associated domain protein Cep170 interacts with Polo-like kinase 1 and serves as a marker for mature centrioles. *Mol. Biol. Cell* 16, 1095–1107.
28. Lei, K., Zhang, X., Ding, X., Guo, X., Chen, M., Zhu, B., Xu, T., Zhuang, Y., Xu, R., and Han, M. (2009). SUN1 and SUN2 play critical but partially redundant roles in anchoring nuclei in skeletal muscle cells in mice. *Proc. Natl. Acad. Sci. USA* 106, 10207–10212.
29. Meinke, P., Mattioli, E., Haque, F., Antoku, S., Columbaro, M., Straatman, K.R., Worman, H.J., Gundersen, G.G., Lattanzi, G., Wehnert, M., and Shackleton, S. (2014). Muscular dystrophy-associated SUN1 and SUN2 variants disrupt nuclear-cytoskeletal connections and myonuclear organization. *PLoS Genet.* 10, e1004605.
30. Wheeler, M.A., Davies, J.D., Zhang, Q., Emerson, L.J., Hunt, J., Shanahan, C.M., and Ellis, J.A. (2007). Distinct functional domains in nesprin-1 $\alpha$  and nesprin-2 $\beta$  bind directly to emerin and both interactions are disrupted in X-linked Emery-Dreifuss muscular dystrophy. *Exp. Cell Res.* 313, 2845–2857.
31. Zhang, Q., Bethmann, C., Worth, N.F., Davies, J.D., Wasner, C., Feuer, A., Ragnauth, C.D., Yi, Q., Mellad, J.A., Warren, D.T., et al. (2007). Nesprin-1 and -2 are involved in the pathogenesis of Emery Dreifuss muscular dystrophy and are critical for nuclear envelope integrity. *Hum. Mol. Genet.* 16, 2816–2833.
32. Bonne, G., Di Barletta, M.R., Varnous, S., Bécane, H.M., Hammouda, E.H., Merlini, L., Muntoni, F., Greenberg, C.R., Gary, F., Urtizberea, J.A., et al. (1999). Mutations in the gene encoding lamin A/C cause autosomal dominant Emery-Dreifuss muscular dystrophy. *Nat. Genet.* 21, 285–288.
33. Voit, T., Cirak, S., Abraham, S., Karakesisoglou, I., Parano, E., Pavone, P., Falsaperla, R., Amthor, H., Schroeder, J., Muntoni, F., et al. (2007). C.O.4 Congenital muscular dystrophy with adducted thumbs, mental retardation, cerebellar hypoplasia and cataracts is caused by mutation of Enaptin (Nesprin-1): the third nuclear envelopopathy with muscular dystrophy. *Neuromuscul. Disord.* 17, 833–834.
34. Gillingham, A.K., and Munro, S. (2000). The PACT domain, a conserved centrosomal targeting motif in the coiled-coil proteins AKAP450 and pericentrin. *EMBO Rep.* 1, 524–529.
35. Rajgor, D., Mellad, J.A., Autore, F., Zhang, Q., and Shanahan, C.M. (2012). Multiple novel nesprin-1 and nesprin-2 variants act as versatile tissue-specific intracellular scaffolds. *PLoS ONE* 7, e40098.
36. Zhang, Q., Skepper, J.N., Yang, F., Davies, J.D., Hegyi, L., Roberts, R.G., Weissberg, P.L., Ellis, J.A., and Shanahan, C.M. (2001). Nesprins: a novel family of spectrin-repeat-containing proteins that localize to the nuclear membrane in multiple tissues. *J. Cell Sci.* 114, 4485–4498.
37. Lin, T.C., Neuner, A., and Schiebel, E. (2015). Targeting of  $\gamma$ -tubulin complexes to microtubule organizing centers: conservation and divergence. *Trends Cell Biol.* 25, 296–307.
38. Takahashi, M., Yamagiwa, A., Nishimura, T., Mukai, H., and Ono, Y. (2002). Centrosomal proteins CG-NAP and kendrin provide microtubule nucleation sites by anchoring  $\gamma$ -tubulin ring complex. *Mol. Biol. Cell* 13, 3235–3245.
39. Dammermann, A., and Merdes, A. (2002). Assembly of centrosomal proteins and microtubule organization depends on PCM-1. *J. Cell Biol.* 159, 255–266.
40. Oddoux, S., Zaal, K.J., Tate, V., Kenea, A., Nandkeolyar, S.A., Reid, E., Liu, W., and Ralston, E. (2013). Microtubules that form the stationary lattice of muscle fibers are dynamic and nucleated at Golgi elements. *J. Cell Biol.* 203, 205–213.
41. Fong, K.-W., Choi, Y.-K., Rattner, J.B., and Qi, R.Z. (2008). CDK5RAP2 is a pericentriolar protein that functions in centrosomal attachment of the gamma-tubulin ring complex. *Mol. Biol. Cell* 19, 115–125.
42. Buchman, J.J., Tseng, H.-C., Zhou, Y., Frank, C.L., Xie, Z., and Tsai, L.-H. (2010). Cdk5rap2 interacts with pericentrin to maintain the neural progenitor pool in the developing neocortex. *Neuron* 66, 386–402.
43. Chen, C.-T., Hehny, H., Yu, Q., Farkas, D., Zheng, G., Redick, S.D., Hung, H.-F., Samtani, R., Jurczyk, A., Akbarian, S., et al. (2014). A unique set of centrosome proteins requires pericentrin for spindle-pole localization and spindle orientation. *Curr. Biol.* 24, 2327–2334.
44. Kim, S., and Rhee, K. (2014). Importance of the CEP215-pericentrin interaction for centrosome maturation during mitosis. *PLoS ONE* 9, e87016.
45. Bitoun, M., Maugendre, S., Jeannot, P.Y., Lacène, E., Ferrer, X., Laforêt, P., Martin, J.J., Laporte, J., Lochmüller, H., Beggs, A.H., et al. (2005). Mutations in dynamin 2 cause dominant centronuclear myopathy. *Nat. Genet.* 37, 1207–1209.
46. Cadot, B., Gache, V., and Gomes, E.R. (2015). Moving and positioning the nucleus in skeletal muscle - one step at a time. *Nucleus* 6, 373–381.
47. Metzger, T., Gache, V., Xu, M., Cadot, B., Folker, E.S., Richardson, B.E., Gomes, E.R., and Baylies, M.K. (2012). MAP and kinesin-dependent nuclear positioning is required for skeletal muscle function. *Nature* 484, 120–124.
48. Cadot, B., Gache, V., Vasyutina, E., Falcone, S., Birchmeier, C., and Gomes, E.R. (2012). Nuclear movement during myotube formation is microtubule and dynein dependent and is regulated by Cdc42, Par6 and Par3. *EMBO Rep.* 13, 741–749.
49. Grady, R.M., Starr, D.A., Ackerman, G.L., Sanes, J.R., and Han, M. (2005). Syne proteins anchor muscle nuclei at the neuromuscular junction. *Proc. Natl. Acad. Sci. USA* 102, 4359–4364.
50. Nedelec, F., and Foethke, D. (2007). Collective Langevin dynamics of flexible cytoskeletal fibers. *New J. Phys.* 9, 427.
51. Mogessie, B., Roth, D., Rahil, Z., and Straube, A. (2015). A novel isoform of MAP4 organises the paraxial microtubule array required for muscle cell differentiation. *eLife* 4, e05697.
52. Shulman, M., Wilde, C.D., and Köhler, G. (1978). A better cell line for making hybridomas secreting specific antibodies. *Nature* 276, 269–270.
53. Haque, F., Lloyd, D.J., Smallwood, D.T., Dent, C.L., Shanahan, C.M., Fry, A.M., Trembath, R.C., and Shackleton, S. (2006). SUN1 interacts with nuclear lamin A and cytoplasmic nesprins to provide a physical connection

- between the nuclear lamina and the cytoskeleton. *Mol. Cell. Biol.* 26, 3738–3751.
54. Chi, Y.-H., Cheng, L.I., Myers, T., Ward, J.M., Williams, E., Su, Q., Faucette, L., Wang, J.-Y., and Jeang, K.-T. (2009). Requirement for Sun1 in the expression of meiotic reproductive genes and piRNA. *Development* 136, 965–973.
  55. Cong, L., Ran, F.A., Cox, D., Lin, S., Barretto, R., Habib, N., Hsu, P.D., Wu, X., Jiang, W., Marraffini, L.A., and Zhang, F. (2013). Multiplex genome engineering using CRISPR/Cas systems. *Science* 339, 819–823.
  56. Solovei, I., Wang, A.S., Thanisch, K., Schmidt, C.S., Krebs, S., Zwerger, M., Cohen, T.V., Devys, D., Foisner, R., Peichl, L., et al. (2013). LBR and lamin A/C sequentially tether peripheral heterochromatin and inversely regulate differentiation. *Cell* 152, 584–598.
  57. Chojnowski, A., Ong, P.F., Wong, E.S.M., Lim, J.S.Y., Mutalif, R.A., Navasankari, R., Dutta, B., Yang, H., Liow, Y.Y., Sze, S.K., et al. (2015). Progerin reduces LAP2 $\alpha$ -telomere association in Hutchinson-Gilford progeria. *eLife* 4, e07759.
  58. Burke, B., Griffiths, G., Reggio, H., Louvard, D., and Warren, G. (1982). A monoclonal antibody against a 135-K Golgi membrane protein. *EMBO J.* 1, 1621–1628.
  59. Janson, M.E., de Dood, M.E., and Dogterom, M. (2003). Dynamic instability of microtubules is regulated by force. *J. Cell Biol.* 161, 1029–1034.



## STAR★METHODS

## KEY RESOURCES TABLE

| REAGENT or RESOURCE                                                                                      | SOURCE                                      | IDENTIFIER                       |
|----------------------------------------------------------------------------------------------------------|---------------------------------------------|----------------------------------|
| Antibodies                                                                                               |                                             |                                  |
| Rabbit polyclonal anti-Pericentrin                                                                       | Covance                                     | Cat# PRB-432C; RRID: AB_2313709  |
| Rabbit polyclonal anti-Pericentrin                                                                       | Abcam                                       | Cat#ab4448; RRID: AB_304461      |
| Mouse monoclonal anti-Pericentrin                                                                        | BD Biosciences                              | Cat#611814; RRID: AB_399294      |
| Rabbit anti-Pericentrin                                                                                  | Kunsoo Rhee [52]                            | N/A                              |
| Mouse monoclonal anti-myosin, sarcomere (MHC)                                                            | Developmental Studies Hybridoma Bank (DSHB) | Cat#MF20; RRID: AB_2147781       |
| Mouse monoclonal anti-GAPDH [GT239]                                                                      | GeneTex                                     | Cat#GTX627408; RRID: AB_11174761 |
| Mouse monoclonal anti-Nesprin-1, clone 9F10                                                              | This paper                                  | N/A                              |
| Mouse monoclonal anti-Nesprin-1, clone MANNES1A                                                          | Glenn E. Morris [18]                        | N/A                              |
| Mouse monoclonal anti-Nesprin-1, clone MANNES1E                                                          | Glenn E. Morris [18]                        | N/A                              |
| Mouse monoclonal anti-Myc, 9E10                                                                          | Developmental Studies Hybridoma Bank (DSHB) | Cat#9E10; RRID: AB_2266850       |
| Rabbit polyclonal anti-Akap9                                                                             | Sigma-Aldrich                               | Cat#HPA026109; RRID: AB_844688   |
| Rabbit polyclonal anti-PCM1                                                                              | Bethyl Laboratories                         | Cat#A301-149A; RRID: AB_2160197  |
| Mouse monoclonal anti-Myogenin, F5D                                                                      | Developmental Studies Hybridoma Bank (DSHB) | Cat#F5D; RRID: AB_2146602        |
| Rabbit polyclonal anti-Sun1 (UNC84A)                                                                     | Sigma-Aldrich                               | Cat#AV49929; RRID: AB_1858623    |
| Rabbit anti Sun1                                                                                         | [53]                                        | N/A                              |
| Rabbit anti-Sun2                                                                                         | ImmuQuest                                   | Cat# IQ444; RRID: AB_10659143    |
| Rabbit monoclonal anti-Kif5b [EPR10276(B)]                                                               | Abcam                                       | Cat#ab167429                     |
| anti-Klc1/2                                                                                              | Scott T. Brady                              | N/A                              |
| Mouse monoclonal anti-Cep170                                                                             | Thermo Fisher Scientific                    | Cat#41-3200; RRID: AB_2533502    |
| Mouse monoclonal anti-GM130                                                                              | BD Biosciences                              | Cat##610823; RRID: AB_398142     |
| Rabbit polyclonal anti-CDK5RAP2                                                                          | Bethyl Laboratories                         | Cat#IHC-00063; RRID: AB_2076863  |
| Donkey anti-Rabbit IgG (H+L) Highly Cross-Adsorbed Secondary Antibody, Alexa Fluor 488                   | Thermo Fisher Scientific                    | Cat#A21206                       |
| Donkey anti-Rabbit IgG (H+L) Highly Cross-Adsorbed Secondary Antibody, Alexa Fluor 568                   | Thermo Fisher Scientific                    | Cat#A10042                       |
| Goat anti-Mouse IgG1 Cross-Adsorbed Secondary Antibody, Alexa Fluor 488                                  | Thermo Fisher Scientific                    | Cat#A21121                       |
| Goat anti-Mouse IgG (H+L) Cross-Adsorbed Secondary Antibody, Alexa Fluor 555                             | Thermo Fisher Scientific                    | Cat#21424                        |
| Goat anti-Mouse IgG1 Cross-Adsorbed Secondary Antibody, Alexa Fluor 568                                  | Thermo Fisher Scientific                    | Cat#A21124                       |
| Goat anti-Mouse IgG1 Cross-Adsorbed Secondary Antibody, Alexa Fluor 647                                  | Thermo Fisher Scientific                    | Cat#A21240                       |
| Goat anti-Mouse IgG2b Cross-Adsorbed Secondary Antibody, Alexa Fluor 568                                 | Thermo Fisher Scientific                    | Cat#A21144                       |
| Goat anti-Rabbit IgG (H+L) Highly Cross-Adsorbed Secondary Antibody, Alexa Fluor 647                     | Thermo Fisher Scientific                    | Cat#21245                        |
| Goat anti-Mouse IgG2b Cross-Adsorbed Secondary Antibody, Alexa Fluor 647                                 | Thermo Fisher Scientific                    | Cat#A21242                       |
| Donkey anti-Rat IgG (H+L) Highly Cross-Adsorbed Secondary Antibody, Alexa Fluor 488                      | Thermo Fisher Scientific                    | Cat#A21208                       |
| Goat anti-Mouse IgG (H+L) Highly Cross-Adsorbed Secondary Antibody, Alexa Fluor Plus 647 (for SD-dSTORM) | Thermo Fisher Scientific                    | Cat#A32728                       |

(Continued on next page)

**Continued**

| REAGENT or RESOURCE                                                                                       | SOURCE                   | IDENTIFIER      |
|-----------------------------------------------------------------------------------------------------------|--------------------------|-----------------|
| Goat anti-Rabbit IgG (H+L) Highly Cross-Adsorbed Secondary Antibody, Alexa Fluor Plus 647 (for SD-dSTORM) | Thermo Fisher Scientific | Cat#A32733      |
| Donkey anti-Mouse IgG (H+L) Highly Cross-Adsorbed Secondary Antibody, CF680 (for SD-dSTORM)               | Biotium                  | Cat#20483       |
| Donkey anti-Rabbit IgG (H+L) Highly Cross-Adsorbed Secondary Antibody, CF680 (for SD-dSTORM)              | Biotium                  | Cat#20344       |
| <b>Bacterial and Virus Strains</b>                                                                        |                          |                 |
| <i>Escherichia coli</i> : BL21(DE3) strain                                                                | Stratagene / Agilent     | Cat#200131      |
| <b>Chemicals, Peptides, and Recombinant Proteins</b>                                                      |                          |                 |
| Nocodazole                                                                                                | Sigma-Aldrich            | Cat#M1404       |
| Lipofectamine 2000 transfection reagent                                                                   | Thermo Fisher Scientific | Cat#11668019    |
| Lipofectamine 3000 transfection reagent                                                                   | Thermo Fisher Scientific | Cat#L3000008    |
| jetPRIME                                                                                                  | Polyplus-transfection    | Cat#114-07      |
| Biotin                                                                                                    | Sigma-Aldrich            | Cat#B4639       |
| Doxycycline                                                                                               | Fisher Bioreagents       | Cat#BP2653-1    |
| Puromycin                                                                                                 | Sigma-Aldrich            | Cat#P8833       |
| Lys-C protease                                                                                            | Wako                     | Cat# 129-02541  |
| Trypsin                                                                                                   | Promega                  | Cat#V5111       |
| Dynabeads MyOne Streptavidin C1                                                                           | Thermo Fisher Scientific | Cat#65001       |
| Collagenase type II                                                                                       | GIBCO                    | Cat#17101-015   |
| Dispase                                                                                                   | GIBCO                    | Cat#17105-041   |
| gelatin                                                                                                   | Sigma-Aldrich            | Cat#G1890       |
| Matrigel                                                                                                  | Corning Life Sciences    | Cat#354230      |
| Dulbecco's modified Eagle's medium (DMEM)                                                                 | GIBCO                    | Cat#41966       |
| DMEM with GlutaMAX                                                                                        | GIBCO                    | Cat#61965-026   |
| DMEM 199 medium                                                                                           | GIBCO                    | Cat#41150       |
| Iscove's Modified Dulbecco's Medium (IMDM) with GlutaMAX                                                  | GIBCO                    | Cat#31980       |
| Hanks' Balanced Salt Solution                                                                             | GIBCO                    | Cat#14170-112   |
| Ham's F10                                                                                                 | GIBCO                    | Cat#11550043    |
| Advanced RPMI 1640                                                                                        | GIBCO                    | Cat#12633020    |
| Opti-MEM I Reduced Serum Medium                                                                           | GIBCO                    | Cat#31985070    |
| Fetal calf serum (FCS)                                                                                    | Eurobio                  | Cat#CVFVSF0001  |
| Fetal bovine serum (FBS)                                                                                  | GIBCO                    | Cat#10270       |
| Penicillin/streptomycin                                                                                   | GIBCO                    | Cat#15140-122   |
| Horse serum                                                                                               | GIBCO                    | Cat#26050088    |
| HAT supplement                                                                                            | GIBCO                    | Cat#21060017    |
| Goat serum                                                                                                | Sigma-Aldrich            | Cat#G9023       |
| Bovine fetuin                                                                                             | Life Technologies        | Cat#10344026    |
| recombinant human EGF                                                                                     | Life Technologies        | Cat#PHG0311     |
| recombinant human FGF-basic                                                                               | Life Technologies        | Cat#PHG0026     |
| bFGF                                                                                                      | Invitrogen               | Cat#13256029    |
| recombinant human insulin                                                                                 | Sigma-Aldrich            | Cat#91077C      |
| dexamethasone                                                                                             | Sigma-Aldrich            | Cat#D4902       |
| gentamicin                                                                                                | GIBCO                    | Cat#15750       |
| Complete protease inhibitor                                                                               | Roche                    | Cat#11697498001 |
| $\beta$ -mercaptoethylamine (MEA)                                                                         | Sigma-Aldrich            | Cat#30070       |
| glucose oxidase                                                                                           | Sigma-Aldrich            | Cat#G2133       |
| catalase                                                                                                  | Sigma-Aldrich            | Cat#C100        |

(Continued on next page)

**Continued**

| REAGENT or RESOURCE                                                                                                                                         | SOURCE                                                     | IDENTIFIER                     |
|-------------------------------------------------------------------------------------------------------------------------------------------------------------|------------------------------------------------------------|--------------------------------|
| Lysozyme                                                                                                                                                    | Sigma-Aldrich                                              | Cat#L7651                      |
| Glutathione Sepharose 4B                                                                                                                                    | GE Healthcare                                              | Cat#17075601                   |
| GST-Nesprin-1 $\alpha$ -326-634                                                                                                                             | This paper                                                 | N/A                            |
| Polyethylene glycol solution, 50% w/v, Mw ~1500                                                                                                             | Sigma-Aldrich                                              | Cat#P7181                      |
| Freund's Complete Adjuvant                                                                                                                                  | Thermo Fisher Scientific                                   | Cat#77140                      |
| Freund's Incomplete Adjuvant                                                                                                                                | Thermo Fisher Scientific                                   | Cat#77145                      |
| Fluoromount-G                                                                                                                                               | Southern Biotech                                           | Cat#0100-01                    |
| Prolong Diamond                                                                                                                                             | Invitrogen                                                 | Cat#P36961                     |
| 1,4-Diazabicyclo[2.2.2]octane (DABCO)                                                                                                                       | Sigma-Aldrich                                              | Cat#D27802                     |
| Vectashield                                                                                                                                                 | Vector Laboratories                                        | Cat#H-1000                     |
| 4',6-diamidino-2-phenylindole dihydrochloride (DAPI)                                                                                                        | Molecular Probes                                           | Cat#D1306                      |
| 4x Laemmli sample buffer                                                                                                                                    | Bio-Rad                                                    | Cat#1610747                    |
| 1x Tris/Glycine buffer                                                                                                                                      | Bio-Rad                                                    | Cat#1610771                    |
| IRDye 800CW Streptavidin                                                                                                                                    | Li-Cor                                                     | Cat#925-32230                  |
| IRDye 680RD Goat anti-Mouse IgG (H + L)                                                                                                                     | Li-Cor                                                     | Cat#926-68070                  |
| Critical Commercial Assays                                                                                                                                  |                                                            |                                |
| ThermoScript <sup>TM</sup> RT-PCR System for First-Strand cDNA Synthesis                                                                                    | Thermo Fisher Scientific                                   | Cat#11146025                   |
| Pierce BCA Protein Assay Kit                                                                                                                                | Thermo Fisher Scientific                                   | Cat#23225                      |
| TMT10plex Isobaric Label Reagent Set                                                                                                                        | Thermo Fisher Scientific                                   | Cat# 90406                     |
| SuperSignal West Pico Chemiluminescence kit                                                                                                                 | Thermo Fisher Scientific                                   | Cat#34080                      |
| Luminata Forte Western HRP Substrate                                                                                                                        | Millipore                                                  | Cat#WBLUF0100                  |
| Experimental Models: Cell Lines                                                                                                                             |                                                            |                                |
| Mouse: C2C12 cell line                                                                                                                                      | American Type Culture Collection (ATCC)                    | Cat# CRL-1772; RRID: CVCL_0188 |
| Human: immortalized healthy control myoblasts                                                                                                               | [15, 16]                                                   | N/A                            |
| Human: immortalized myoblasts from a congenital muscular dystrophy patient carrying a homozygous nonsense mutation within the <i>SYNE1</i> (23560 G>T) gene | [15, 16]                                                   | N/A                            |
| Rat hybridoma cell line YL1/2, anti-tubulin reactivity                                                                                                      | European Collection of Authenticated Cell Cultures (ECACC) | Cat#92092402; RRID: CVCL_J781  |
| Human: HeLa cell line                                                                                                                                       | American Type Culture Collection (ATCC)                    | Cat#: CCL-2 RRID: CVCL_0030    |
| Rat: NRK cell line                                                                                                                                          | American Type Culture Collection (ATCC)                    | Cat#: CRL-6509 RRID: CVCL_3758 |
| Mouse: SP2/0-Ag14 myeloma cell line                                                                                                                         | Gift of Karl Riabowol [52]                                 | RRID: CVCL_2199                |
| Experimental Models: Organisms/Strains                                                                                                                      |                                                            |                                |
| Mouse: Sun1 <sup>-/-</sup> ; B6;129-Sun1 <sup>tm1.1Ktj</sup> /N                                                                                             | [54]                                                       | RRID: MGI:3838371              |
| Mouse: Sun2 <sup>-/-</sup> ; B6;129S6-Sun2 <sup>tm1Mhan</sup> /J                                                                                            | [28]                                                       | JAX: 012716 RRID: MGI:3850091  |
| Oligonucleotides                                                                                                                                            |                                                            |                                |
| siRNA targeting sequence: mouse Nesprin-1 #1<br>CCAUCGAGUCUCACAUAAtt                                                                                        | GeneCust                                                   | N/A                            |
| siRNA targeting sequence: mouse Nesprin-1 #2<br>AGUAAGAGGAGAAGGAAUAtt                                                                                       | GeneCust [8]                                               | N/A                            |
| siRNA targeting sequence: mouse Sun1 #1<br>GGCUAUUGAUUCGCACAUtt                                                                                             | Ambion                                                     | Cat#4390771 s94911             |
| siRNA targeting sequence: mouse Sun2 #1<br>CUCUCAGGAUGUAACGAUtt                                                                                             | Ambion                                                     | Cat#4390771 s104591            |
| siRNA targeting sequence: mouse Pericentrin #1<br>GCCGAUCAACAAUUGCUAAtt                                                                                     | Ambion                                                     | Cat#4390771 s71317             |

(Continued on next page)

**Continued**

| REAGENT or RESOURCE                                                       | SOURCE                                        | IDENTIFIER                  |
|---------------------------------------------------------------------------|-----------------------------------------------|-----------------------------|
| siRNA targeting sequence: mouse Pericentrin #2<br>GGGUUUAAUGAAUUGGUCAtt   | Ambion                                        | Cat#4390771 s71316          |
| siRNA targeting sequence: mouse Akap450 #1<br>AUCACUGUGCAACUUGAAUAAAGAA   | Integrated DNA Technologies                   | Cat# mm.Ri.Akap9.13.1       |
| siRNA targeting sequence: mouse Akap450<br>#2 UACCUUUCAUUGGACAGGUUUCUAUCG | Integrated DNA Technologies                   | Cat# mm.Ri.Akap9.13.2       |
| siRNA targeting sequence: mouse Pcm1 #1<br>AGUCAGAUUCUGCAACAU GAUCUTG     | Integrated DNA Technologies                   | Cat# mm.Ri.Pcm1.13.1        |
| siRNA targeting sequence: mouse Pcm1 #2<br>AAUAGUAUCCCGUAAAGCUCAAACAU     | Integrated DNA Technologies                   | Cat# mm.Ri.Pcm1.13.2        |
| See also <a href="#">Table S2</a> for other siRNAs and primers            | N/A                                           | N/A                         |
| <b>Recombinant DNA</b>                                                    |                                               |                             |
| pcDNA3.1 EGFP-Nesprin-1 $\alpha$                                          | This paper                                    | N/A                         |
| pTripZ-mycBirA*-Nesprin-1 $\alpha$                                        | This paper                                    | N/A                         |
| pGEX-4T-1 GST-Nesprin-1 $\alpha$ -326-634                                 | This paper                                    | N/A                         |
| pTripZ-mycBirA*-Nesprin-2 $\beta$                                         | This paper                                    | N/A                         |
| pTripZ-mycBirA*-Nesprin-1 $\alpha$ (WD/AA)                                | This paper                                    | N/A                         |
| pX330-U6-Chimeric BB-CBh-hSpCas9                                          | [55]                                          | Addgene plasmid Cat#42230   |
| pX330-Nesprin-1-N-ter-CRISPR                                              | This paper                                    | N/A                         |
| pX330-Nesprin-1-C-ter-CRISPR                                              | This paper                                    | N/A                         |
| dsRed-PACT                                                                | Sean Munro [34]                               | N/A                         |
| <b>Software and Algorithms</b>                                            |                                               |                             |
| Cytosim                                                                   | Francois Nedelec [50]                         | N/A                         |
| GraphPad Prism                                                            | GraphPad Software                             | Version 6; RRID: SCR_002798 |
| Fiji                                                                      | <a href="https://fiji.sc">https://fiji.sc</a> | RRID: SCR_002285            |
| SoftWorX program                                                          | Applied Precision                             | N/A                         |
| Metamorph Software                                                        | Molecular Devices                             | RRID: SCR_002368            |
| Proteome Discoverer 2.1                                                   | Thermo Fisher Scientific                      | RRID: SCR_014477            |
| Mascot 2.5.1                                                              | Matrix Science                                | RRID: SCR_014322            |
| Spreading factor algorithm                                                | This paper, VBA Excel                         | N/A                         |
| <b>Other</b>                                                              |                                               |                             |
| Inverted Nikon Ti microscope                                              | Nikon                                         | N/A                         |
| DeltaVision CORE                                                          | GE / Applied Precision                        | N/A                         |
| Plan Apochromat 40 $\times$ /1.35 NA oil-immersion objective lens         | Olympus                                       | N/A                         |
| CCD camera CoolSNAP HQ                                                    | Photometrics                                  | N/A                         |
| Leica SPE confocal microscope                                             | Leica                                         | N/A                         |
| Nikon Spinning disk confocal microscope                                   | Nikon                                         | N/A                         |
| OMX V4 Blaze                                                              | GE Healthcare                                 | Cat#29065721                |
| CoolSNAP HQ2 camera                                                       | Roper Scientific                              | N/A                         |
| Zeiss LSM510 confocal microscope                                          | Carl Zeiss AG                                 | N/A                         |
| Environmental chamber                                                     | Okolab                                        | Stage Top Incubator, H301   |
| Odyssey Imaging System                                                    | Li-Cor                                        | No longer available         |
| Orbitrap Fusion mass spectrometer coupled to nanoUPLC Easy LC 1000 system | Thermo Fisher Scientific                      | N/A                         |
| Sep-Pak C-18 cartridges                                                   | Waters                                        | Cat# WAT051910              |
| C18 Basic Resins 10 $\mu$ m                                               | Dr. Maisch                                    | Cat# r10.b9.0025            |
| Easy spray column 50 cm $\times$ 75 $\mu$ m (C18, 1.8 $\mu$ m)            | Thermo Fisher Scientific                      | Cat#ES-803                  |
| 8-well $\mu$ -slides                                                      | ibidi                                         | Cat#80826                   |
| 96-well $\mu$ -plates                                                     | ibidi                                         | Cat#89626                   |

(Continued on next page)



**Continued**

| REAGENT or RESOURCE                                      | SOURCE        | IDENTIFIER   |
|----------------------------------------------------------|---------------|--------------|
| Slides with molds providing a 100 $\mu$ l spherical void | Carl Roth     | Cat#H884.1   |
| TetraSpeck multicolor beads                              | Invitrogen    | Cat#T7279    |
| QIAshredder                                              | Quiagen       | Cat#79656    |
| 4-15% Mini-PROTEAN TGX protein gels                      | Bio-Rad       | Cat#4561084  |
| Trans-Blot Turbo Transfer system                         | Bio-Rad       | Cat# 1704150 |
| 4-12% NuPAGE NovexBis-Tris gels                          | Invitrogen    | Cat#NP0335   |
| Amersham Hyperfilm                                       | GE Healthcare | Cat#10094984 |

**CONTACT FOR REAGENT AND RESOURCE SHARING**

Further information and requests for resources and reagents should be directed to and will be fulfilled by the Lead Contact, Edgar R. Gomes ([edgargomes@medicina.ulisboa.pt](mailto:edgargomes@medicina.ulisboa.pt)).

**EXPERIMENTAL MODEL AND SUBJECT DETAILS****Cell lines and culture**

Mouse C2C12 myogenic precursor cells were cultivated at 37°C/5% CO<sub>2</sub> in Dulbecco's modified Eagle's medium (DMEM) containing 4.5 g/L D-glucose, 4 mM L-glutamine, 1 mM sodium pyruvate, 10% fetal calf serum, and 100 U/ml penicillin; 100  $\mu$ g/ml streptomycin. C2C12 cells are female. Cells were not authenticated. For immunofluorescence, C2C12 myoblasts were seeded on coverslips, 8-well  $\mu$ -slides or 96-well  $\mu$ -plates coated with 0.1% gelatin or Matrigel diluted 1:100 in DMEM. When C2C12 cells reached ~90% confluence, they were switched to DMEM supplemented with 2% horse serum and 100 U/ml penicillin; 100  $\mu$ g/ml streptomycin to induce myogenic differentiation for the indicated time points.

For generating Nesprin-1 CRISPR cell lines, wild-type C2C12 were transfected overnight using Lipofectamine 3000 according to manufacturer's instructions with pX330 encoding Nesprin-1 N- and C-termini-directed sgRNAs and pEGFP-N1 in a 9:9:2 ratio. Cells with high levels of EGFP expression, representing high levels of pX330 transfection, were sorted as single cells into 96-well plates at the Singapore Immunology Network FACS facility. Loss of Nesprin-1 NE localization in clonal lines was assessed by immunofluorescence microscopy. Nesprin-1 CRISPR cell lines were cultivated and maintained as wild-type C2C12 cells as described above.

Human myoblasts from a healthy control or from a congenital muscular dystrophy patient carrying a homozygous nonsense mutation within the *SYNE1* gene (nucleotide 23560 G>T) were immortalized by Kamel Mamchaoui and Vincent Mouly (Center for Research in Myology, Paris, France) via transduction with retrovirus vectors expressing *hTERT* and *Cdk4* as described previously [15, 16]. Human myoblasts were cultivated in growth medium containing DMEM with GlutaMAX and DMEM 199 medium (4:1 ratio), supplemented with 20% FBS, 25  $\mu$ g/ml bovine fetuin, 5 ng/ml recombinant human EGF, 0.5 ng/ml recombinant human FGF-basic, 5  $\mu$ g/ml recombinant human insulin, 0.2  $\mu$ g/ml dexamethasone, and 0.1% gentamicin. For immunofluorescence, human myoblasts were seeded on coverslips coated with Matrigel diluted 1:100 in DMEM, grown to ~90% confluence and induced for differentiation by changing to Iscove's Modified Dulbecco's Medium (IMDM) with GlutaMAX, 2% horse serum, and 0.1% gentamicin.

**Mouse strains and primary myoblasts**

The *Sun1*<sup>-/-</sup> (B6;129-*Sun1*<sup>tm1.1Kti</sup>/N RRID: MGI:3838371) and *Sun2*<sup>-/-</sup> (B6;129S6-*Sun2*<sup>tm1Mhan</sup>/J, JAX: 012716, RRID: MGI:3850091) mice were previously described [28, 54] and were maintained at the A\*STAR Biological Resource Centre facility in accordance with the guidelines of the Institutional Animal Care and Use Committee. Primary myoblasts were obtained from E18.5 mouse embryos as *Sun1*<sup>-/-</sup> *Sun2*<sup>-/-</sup> double mutant mice die shortly after birth. Limb muscles were dissected away from skin and bones. Muscle tissue was digested in enzyme solution (0.5% w/v collagenase type II, 1.2 U/ml dispase, 2.5 mM CaCl<sub>2</sub>, 25 mM HEPES in Hanks' Balanced Salt Solution) for 30 min at 37°C [56] with gentle trituration using a plastic pipette tip every 10-15 min. Following addition of DMEM containing 10% FBS, resultant tissue slurry was filtered successively through 70  $\mu$ m and 40  $\mu$ m cell strainers. Cells were plated onto tissue culture plates for 1-2 hr in 37°C/5% CO<sub>2</sub> to allow contaminating fibroblasts to adhere. The myoblast enriched fraction was then plated onto 0.1% gelatin-coated tissue culture plates and maintained in Ham's F10 containing 20% fetal bovine serum and 10  $\mu$ g/ml bFGF in 37°C/5%CO<sub>2</sub>. Myoblast enrichment by preplating of fibroblasts was repeated every 2-3 days until most fibroblasts were removed from the myoblast culture. Primary myoblasts were differentiated into myotubes by changing to DMEM supplemented with 2% horse serum and 100 U/ml penicillin; 100  $\mu$ g/ml streptomycin. Due to the difficulty of sexing mouse embryos visually, sex of primary myoblasts derived from E18.5 embryos was not determined.

## METHOD DETAILS

### Antibodies

The following primary antibodies were used for immunofluorescence and Western Blot analysis: rabbit anti-Pericentrin, mouse anti-Pericentrin, mouse anti-myosin, sarcomere MHC, mouse anti-GAPDH, mouse anti-Nesprin-1 (clone 9F10), mouse anti-Myc (clone 9E10), rabbit anti-Akap9, rabbit anti-PCM1, mouse anti-Myogenin (clone F5D), rat anti-tyrosinated- $\alpha$ -tubulin (clone YL1/2), rabbit anti-Sun1, rabbit anti-Sun2, rabbit anti-Kif5b, mouse anti-Cep170, mouse anti-GM130, and rabbit anti-CDK5RAP2. The mouse anti-Nesprin-1 (MANNES1E; MANNES1A), anti-Klc1/2, and anti-Pericentrin antibodies were kind gifts from Glenn E. Morris, Scott T. Brady, and Kunsoo Rhee, respectively. Details of secondary antibodies are in the [Key Resources Table](#).

### siRNA/DNA transfection

C2C12 cells were transfected at approximately 30% confluency with siRNA (20 or 50 nM final concentration) by addition of transfection complexes pre-formed for 20 min, containing 0.3  $\mu$ L Lipofectamine RNAiMAX per pmol of siRNA in Opti-MEM medium. The following siRNAs were used: non-targeting control (NC) siRNA#1, NC siRNA#2, NC siRNA#3, Nesprin-1 siRNA#1, Nesprin-1 siRNA#2, Nesprin-1 siRNA#3, Sun1 siRNA#1, Sun1 siRNA#2, Sun2 siRNA#1, Sun2 siRNA#2, Pericentrin (Pcnt) siRNA#1, Pcnt siRNA#2 or 1:1 mix of Pcnt siRNA#1 and #2, Akap450 siRNA#1, Akap450 siRNA#2, Pcm1 siRNA#1 and Pcm1 siRNA#2, Cdk5rap2 siRNA#1, and Cdk5rap2 siRNA#2, and their sequences are provided in the [Key Resources Table](#) and [Table S2](#).

### Plasmids

Mouse cDNA was obtained from mouse hindlimb skeletal muscle RNA using ThermoScript RT-PCR System for First-Strand cDNA Synthesis with random hexamers. Human cDNA was obtained from HeLa cell RNA using the same kit. Nesprin-1 $\alpha$  cDNA was obtained by PCR from mouse skeletal muscle cDNA using the following primers 5'-GCGCCTCGAGATGGTGGTGGCAGAG GACTTGC-3' and 5'-GCGCCTTAAGTCAGAGTGGAGGAGGACCGTT-3' and ligated into pcDNA3.1 with an EGFP tag following restriction digest with XhoI and AflIII. pTripZ-mycBirA\*-Nesprin-1 $\alpha$  was obtained by PCR amplification of Nesprin-1 $\alpha$  from pcDNA3.1 containing Nesprin-1 $\alpha$  using 5'-AAGCTCGAGATGGTGGTGGCAGAGGACTTGC-3' and 5'-AGGCCACGCGTCTAGGTGAG AGTGGAGGAGG-3' followed by restriction digestion with XhoI and MluI and ligation into pTripZ-mycBirA\* [57]. GST-Nesprin-1 $\alpha$ -326-634 comprising amino acids 326-634 of Nesprin-1 $\alpha$  was obtained by PCR from pcDNA3.1-GFP-Nesprin-1 $\alpha$  using the following primers: 5'-AAAAAGAATTTCGAGCAGCTGATAGAGAAGAGCGAGC-3' and 5'-AAAAACTCGAGTCAGATGTGAGACTC GATGGTGTGGATGTC-3' and ligated into pGEX-4T-1 following restriction digest with EcoRI and XhoI. pTripZ-mycBirA\*-Nesprin-2 $\beta$  was obtained by PCR of Nesprin-2 $\beta$  coding sequence from HeLa cell cDNA using 5'-GCGCCTCGAGATGTCCATGGAGCGGCG CATG-3' and 5'-GCGCACGCGTCTAGGTGATGTGGGGGGTGGCCATTG-3', restriction digest with XhoI and MluI and ligation into pTripZ-mycBirA\*. Site-directed mutagenesis of Nesprin-1 $\alpha$  to obtain Nesprin-1 $\alpha$  (WD/AA) was performed using the megaprimer method – the primers 5'-AAGCTCGAGATGGTGGTGGCAGAGGACTTGC-3' and 5'-TCGTAATCGTGGGCCGCTTCCAGGGG GATGG-3' were used to generate a forward megaprimer, which was used with reverse primer 5'-AGGCCACGCGTCTAGGTCA GAGTGGAGGAGG-3' to PCR amplify mutant Nesprin-1 $\alpha$ . Nesprin-1 $\alpha$  (WD/AA) was then cloned into pTripZ-mycBirA\* by restriction digestion with XhoI and MluI and ligation. For CRISPR-mediated gene editing, oligos encoding single guide RNA sequences targeting Nesprin-1 (N terminus: ACATCACCAATGTGATGCAG, C terminus: CCGTTGGTATATCTGAGCAT) were annealed by heating to 95°C then cooled gradually to room temperature, then ligated into BbsI-digested pX330-U6-Chimeric BB-CBh-hSpCas9 (a gift from Feng Zhang, Addgene plasmid Cat#42230) [55].

### Co-transfection of plasmids

For co-transfection of dsRed-PACT and GFP-Nesprin-1 $\alpha$  or GFP, respectively, 8-well  $\mu$ -slides were coated with sterile-filtered 0.1% gelatin/ddH<sub>2</sub>O for 20 min at room temperature. One day prior to transfection, 9,000 C2C12 cells were seeded per well in 200  $\mu$ L growth medium. When cells reached approximately 80% confluency, cell transfection was carried out using jetPrime. In brief, a total amount of 1  $\mu$ g DNA was diluted in 50  $\mu$ L jetPrime buffer and mixed by vortexing vigorously for 10 s. 2  $\mu$ L jetPrime reagent were added, the mixture was vortexed again for 10 s and shortly spun down. After incubation for 10 min at room temperature, the transfection mix was added drop wise onto the cells which were kept in 200  $\mu$ L freshly added growth medium containing serum and antibiotics. The following day, the growth medium was replaced to circumvent toxic side effects of the transfection reagent. The cells were kept for 36 hr in growth medium to ensure proper expression, fixed in 4% PFA and stained for Myogenin and DAPI.

### Nesprin-1 monoclonal antibody production

Expression of GST-Nesprin-1 $\alpha$ -326-634 was induced in mid-log phase BL21 (DE3) *E. coli* using 0.1 mM IPTG at 30°C for 2 hr. Pelleted bacteria were resuspended in 4°C phosphate buffered saline with 0.1 mg/ml lysozyme then lysed by several freeze-thaw cycles using liquid nitrogen, followed by sonication to shear DNA. Lysates were cleared by centrifugation at 35000 g for 30 min and filtering the supernatant through a 0.45  $\mu$ m filter. GST-Nesprin-1 $\alpha$ -326-634 was purified from cleared lysate by incubation on Glutathione Sepharose 4B beads for 2 hr at room temperature, washed with 3  $\times$  15 column volumes phosphate buffered saline, and eluted in 10 mM reduced glutathione in 50 mM Tris, pH 8. For monoclonal antibody production mice were immunized intraperitoneally with 50  $\mu$ g of fusion protein emulsified with Freund's complete adjuvant. After three weeks a 50  $\mu$ g boost was administered by the same route in incomplete adjuvant. After additional three weeks, a further 50  $\mu$ g was administered in PBS. Three days later, the

spleen was harvested, minced finely, and passed through a 100  $\mu\text{m}$  cell strainer. SP2/0 myeloma cells were maintained in growth medium (Advance RPMI 1640, 2 mM L-glutamine, 50  $\mu\text{M}$  beta-mercaptoethanol, 10% heat inactivated fetal bovine serum, 100 U/ml penicillin; 100  $\mu\text{g}/\text{ml}$  streptomycin). Spleen cells and SP2/0 myeloma cells were washed in GKN saline solution (8 g/L NaCl, 0.4 g/L KCl, 3.56 g/L  $\text{Na}_2\text{HPO}_4 \cdot 12\text{H}_2\text{O}$ , 0.78 g/L  $\text{NaH}_2\text{PO}_4 \cdot 2\text{H}_2\text{O}$ , 2 g/L Glucose). Spleen cells were fused with  $1\text{--}2.5 \times 10^7$  myeloma cells by gradual addition to cell pellet at  $37^\circ\text{C}$  of 1 mL 50% (w/v) polyethylene glycol (Mw  $\sim 1500$ ) over 1 min, incubation for 1 min, addition over 1 min each of 1 mL, 2 mL, 8 mL, then 30 mL GKN saline solution (modified from [58]). Cells were incubated for a further 5 min before pelleting at 300 g for 5 min. Fused cells were distributed into 20 96-well plates in hybridoma medium (Advanced RPMI 1640, 2 mM L-glutamine, 50  $\mu\text{M}$  beta-mercaptoethanol, 15% fetal bovine serum, 20% SP2-conditioned growth medium, 100 U/ml penicillin; 100  $\mu\text{g}/\text{ml}$  streptomycin), which is changed to HAT medium (hybridoma medium with 2x HAT supplement) the following day. After 10 days, culture supernatants were screened by immunofluorescence microscopy on NRK cells grown in 96-well plates with optical plastic bottoms. Positive hybridoma cultures were expanded in 24-well plates and single cell cloned using a flow cytometer. Spent culture medium containing antibody from clone 9F10 was employed for all further experiments.

### BioID proteomics

C2C12 cells were transduced with lentivirus expressing myc-BirA<sup>\*</sup>-Nesprin-1 $\alpha$  and stable integration of the transgene was selected for using 0.67  $\mu\text{g}/\text{ml}$  puromycin. For each BioID sample, stably transduced cells were expanded in 5-layer flasks and either harvested for myoblast samples, or switched to differentiation medium for 4 days before harvesting for myotube samples. Prior to harvesting, cells were incubated with 50  $\mu\text{M}$  biotin and 1  $\mu\text{g}/\text{ml}$  doxycycline for 1-2 days. For control samples, cells were incubated without biotin and doxycycline, or with biotin only. Affinity purification of biotinylated proteins was performed as previously described [13, 57], by lysing and sonicating cells in lysis buffer (50 mM Tris, pH 7.4, 500 mM NaCl, 0.4% SDS, 5 mM EDTA, 1 mM DTT, and 1x complete protease inhibitor). Following addition of Triton X-100 to 2% and further sonication, an equal volume of 50 mM Tris (pH 7.4) was added before additional sonication. Cell lysates were subjected to centrifugation at 16000 relative centrifugal force and supernatants were incubated on MyOne Steptavidin C1 Dynabeads to capture biotinylated proteins. Beads were washed sequentially with wash buffer 1 (2% SDS), wash buffer 2 (0.1% deoxycholate, 1% Triton X-100, 500 mM NaCl, 1 mM EDTA, and 50 mM HEPES, pH 7.5), wash buffer 3 (250 mM LiCl, 0.5% NP-40, 0.5% deoxycholate, 1 mM EDTA, and 10 mM Tris, pH 8.1) and twice with wash buffer 4 (50 mM Tris, pH 7.4, and 50 mM NaCl).

### Mass spectrometry

Mass spectrometry samples were in-solution digested. After streptavidin affinity purification, beads were denatured using 50% 2,2,2-trifluoroethanol (TFE) in 100 mM triethylammonium bicarbonate (TEAB). Proteins were reduced in 25 mM Tris(2-carboxyethyl)phosphine and alkylated with 55 mM 2-chloroacetamide. Prior digestion sample was further diluted with 100 mM TEAB to achieve TFE final concentration below 5%. Digestion with Lys-C for 4 hr (1:100 enzyme/protein ratio) and Trypsin for 18 hr (1:100) was performed. Following acidification with 1% trifluoroacetic acid, samples were desalted with Sep-Pak C-18 cartridges. Samples were labeled with a TMT (tandem mass tag) isobaric labeling kit in 100 mM TEAB with 10  $\mu\text{L}$  label for 25  $\mu\text{g}$  peptides as suggested in the manufacturer's instructions. Specifically, each sample was re-suspended in 25  $\mu\text{L}$  TEAB; to tag the samples for multiplex measurement, 10  $\mu\text{L}$  of specific TMT label was added to each sample separately (at 1 Da mass spacing: 126, 127, 128 etc.). Reaction was incubated at room temperature for 1 hr and quenched with 30  $\mu\text{L}$  of 10 mM ammonia formate. Following quenching, samples were mixed and fractionated. Samples were desalted on C18 Basic Resins 10  $\mu\text{m}$  and eluted using a step gradient (4 fractions) containing 17.5%; 25%; 30%; 50% acetonitrile further optimized to (3 fractions) 15%, 22%, 50% acetonitrile in 7.5% ammonium hydroxide. Each fraction was vacuum centrifuged and submitted for analysis. An Orbitrap Fusion mass spectrometer coupled to nanoUPLC Easy LC 1000 system was used for analysis. Samples were injected and separated in EasySpray column 50 cm x 75  $\mu\text{m}$  (C18, 1.8  $\mu\text{m}$ ) in a 120 min gradient (Solvent A: 0.1% formic acid; Solvent B: 0.1% formic acid / 99.9% acetonitrile) in data dependent mode using Orbitrap analyzer (speed mode  $-3$  s cycle) with ion targets and resolution (OT-MS 4xE5, resolution 60K, OT-MS/MS 1E5, resolution 15k). Peak lists were generated with Proteome Discoverer 2.1 software and searches were done with Mascot 2.5.1 against concatenated forward/decoy Uniprot/Swiss-Prot with BirA sequences/contaminants database with the following parameters: precursor mass tolerance (MS) 30 ppm, OT-MS/MS 0.06 Da, 3 missed cleavages; static modifications: Carboamidomethyl (C); variable modifications: Oxidation (M), Deamidated (NQ), Acetyl N-terminal protein Phospho (STY), Biotin(K). Forward/decoy searches were used for false discovery rate estimation for PSM and peptides matching high confidence (FDR 1%) and medium confidence (FDR 5%).

### Mass spectrometry data processing

Following protein identification, extracted TMT reporter abundances were used for protein quantitation. For protein normalization, the bait (BirA-Nesprin-1 $\alpha$ ) expression was assessed in both myoblasts and myotubes. Using BirA<sup>\*</sup> specific peptides, correcting factors were derived and used for normalization of specific Nesprin-1 $\alpha$  interacting proteins. Proteins identified in at least two biological replicates were used for further analysis.

### MT re-growth assay

48 hr differentiated C2C12 or human immortalized cells were treated with 5  $\mu\text{g}/\text{ml}$  nocodazole for 2 hr in the corresponding differentiation medium. After a quick wash, cells were let to recover in fresh differentiation medium for 4 min (human immortalized cells) or

5 min (C2C12 cells) at 37°C/5% CO<sub>2</sub>. Cells were then pre-extracted for 30 s with 1% Triton X-100 in PHEM buffer (60 mM PIPES, 25 mM HEPES, 10 mM EGTA, 2 mM MgCl<sub>2</sub>, pH 6.9), fixed with 4% paraformaldehyde (PFA) and stained as indicated below.

### Immunofluorescence

Cells were fixed either in methanol for 20 min at –20°C or in 4% PFA for 15 min at room temperature (RT) and then permeabilized with 0.5% Triton X-100/PBS for 5 min at RT. For detection of Klc1/2 at the NE, cells were pre-extracted for 20 s prior to fixation. After three washes in PBS, cells were blocked in 3% bovine serum albumin or 10% goat serum in PBS for 30 min at RT. Primary antibodies were incubated in blocking buffer for 1–2 hr at RT or at 4°C overnight. Following primary antibody incubation, cells were washed with PBS, incubated with fluorophore-conjugated secondary antibodies and DAPI in blocking buffer for 1 hr at RT, washed with PBS, and mounted in Fluoromount-G or Prolong Diamond or 1% DABCO (1,4-Diazabicyclo[2.2.2]octane) in 10% PBS / 90% glycerol.

### Imaging

Wide-field epi-fluorescence imaging was performed on an inverted Nikon Ti microscope equipped with a XY-motorized stage using 20x 0.45 NA S Plan Fluor air or 40x 1.3 NA Plan Fluor oil objectives with a 1.5x magnifier. Digital images were acquired with a CoolSNAP HQ2 camera using Metamorph Software and processed in Fiji. For analyses of C2C12 cells after MT re-growth assay, a maximum projection of four 0.25 μm z sections was directly created during imaging using Metamorph. Images were adjusted using the unsharp mask plugin of Fiji. Wide-field epi-fluorescence images were also acquired on a DeltaVision CORE equipped with a xenon light source and bandpass filters with a Plan Apochromat 40 × /1.35 NA oil-immersion objective lens and a CCD camera (no binning; CoolSNAP HQ). For deconvolved images, z-spacing was fixed at 0.2 μm on the DeltaVision CORE and deconvolution then completed using the SoftWorX program. Live-cell imaging of differentiating human immortalized cells was performed for 63 hr in an environmental chamber at 37°C and 5% CO<sub>2</sub> using a 10x 0.3 NA PL Fluo objective. Confocal images of human immortalized cells after MT re-growth assay and staining were acquired on a Leica SPE confocal microscope using the 63x 1.3 NA Apo objective or on a Nikon Spinning disk confocal with EMCCD camera using a 60x (oil) 1.4 NA objective. Confocal images of C2C12 cells were also obtained on a Zeiss LSM510 confocal microscope using a 40x 1.3 NA objective.

### SD-dSTORM

Wild-type C2C12 cells were differentiated for 48 hr, fixed and stained for Pericentrin and Nesprin-1 (MANNES1E antibody) as described above. Alexa Fluor 647 and CF 680 labeled secondary antibodies were used. This dye pair has previously been shown to be suitable for spectral demixing (SD)-dSTORM [26]. For SD-dSTORM, coverslips were mounted in imaging buffer (50 mM Tris/HCl, 10 mM NaCl, pH 8) containing 10 mM β-mercaptoethylamine (MEA), 0.5 mg/ml glucose oxidase, 40 μg/ml catalase, and 10% (w/v) glucose on slides with molds. Images were acquired on a custom-build SD-dSTORM system using a 700-DCXXR dichroic mirror and a F76-635 emission bandpass filter and reconstructed as described previously [25, 26].

### Structured illumination microscopy (SIM)

Wild-type C2C12 cells were differentiated for 48 hr, subjected to MT re-growth assay, fixed and stained as described above. Coverslips were mounted using Vectashield and sealed with nail polish. 3D-SIM images were generated using the 488 nm, 568 nm, and 643 nm laser lines and standard filter sets on the OMX V4 Blaze. Precise registration (within ~40 nm) of the three-color channels was verified using TetraSpeck multicolor beads mounted on coverslips.

### SDS-PAGE and Western Blot analysis

C2C12 cells were lysed in 1% SDS/PBS and homogenized by full-speed centrifugation for one minute using a QIAshredder. Total protein concentration was determined using the Pierce bicinchoninic acid (BCA) protein assay kit. Equal protein amounts were mixed with 4x Laemmli sample buffer, heated for 5 min at 95°C, loaded on 4%–15% Mini-PROTEAN TGX protein gels and transferred onto a nitrocellulose membrane using the Trans-Blot Turbo Transfer system. For analysis of high molecular weight proteins, samples were loaded on 4%–12% NuPAGE Novex Bis-Tris gels and transferred over night at 30 V in 1x Tris/Glycine buffer containing 10% ethanol and 0.025% SDS. Membranes were blocked in 5% milk/0.05% Tween-TBS and incubated with primary antibodies over night at 4°C. After incubation with HRP-conjugated secondary antibodies for 1 hr at room temperature, proteins were detected by chemiluminescence using SuperSignal West Pico Chemiluminescence or Luminata Forte Western HRP Substrate and Amersham Hyperfilms. For western blots scanned on an Odyssey imaging system, IRDye 800 or IRDye 680 conjugated secondary antibody or streptavidin was used.

### Computer simulation

Computer simulations were performed using Cytosim [50]. In brief, overdamped Langevin equations are used to describe the motion of elastic fibers and nuclei in a viscous fluid in the presence of Brownian motion. All stochastic events (motor binding, MT catastrophes, and MT nucleation) are generated as first-order random events. The simulation parameters are summarized in Table S1. Myotubes have elliptical shapes, 95 × 14 μm for five nuclei, 114 × 14 μm for six nuclei, 133 × 14 μm for seven nuclei, 152 × 14 μm for eight nuclei and 171 × 14 μm for nine nuclei, with the cytoplasm having homogeneous constant viscosity, as shown experimentally (Figure S4B). The elliptical boundary confines MTs, centrosomes, and nuclei. A soft excluded volume interaction applies to centrosomes, MTs, and nuclei, preventing these objects from overlapping, but MTs only interact with each other via molecular



motors (MT-MT steric interactions are not considered). Nuclei nucleate MTs, which undergo dynamic instability with no rescues. Moreover, the growth rate is reduced by force with a sensitivity of 1.5 pN and depends on the availability of tubulin monomers, for which a fixed pool is prescribed. The catastrophe rate depends on growth rate as observed *in vitro* [59]. MTs are nucleated horizontally, leading to their organization parallel to the long axis of the myotube, as shown by the EB1 comets angle analysis (Figures S4C and S4D). MTs interact with nuclei via the dynein and kinesin motor proteins located at the NE. A given density of motor proteins is evenly distributed on nuclear surfaces. All motor proteins exert Hookean forces and move along bound MTs with a linear force-velocity relationship. The maximum number of MTs nucleated by one nucleus has been estimated by counting the number of EB1 comets near myotube nuclei.

### Experimental Design

All experiments were performed at least twice, typically 3–4 times. To ensure randomization, for quantification of cellular phenotypes, all cells meeting particular criteria (e.g., for nuclear spreading quantification, only myotubes with 3 or more nuclei were considered) in a field of view were counted. While blinding was not used in this study, where possible, automated image analysis was used. Sample-size estimation and statistical method of computation was not performed as it is relatively easy to obtain large numbers ( $N > 100$ ) in cell microscopy-based experiments. Inclusion and exclusion criteria of any data or subjects is described in the methods and include quantification of only Myogenin or myosin heavy chain positive nuclei to identify differentiated myotubes, and nuclear spreading analysis on myotubes with at least 3 nuclei.

## QUANTIFICATION AND STATISTICAL ANALYSIS

### Quantification centrosomal proteins at the NE

We counted the number of nuclei with more than 50% of Pericentrin or Akap450, respectively, at the NE in Myogenin-(MYOG)- or myosin heavy chain-(MHC)-positive cells.

### Quantification MT re-growth

MT re-growth was quantified by counting the number of Myogenin-positive nuclei that showed at least 50% of MT seeds at the NE.

### Quantification dsRed-PACT at the NE

We counted the number of Myogenin-negative cells that showed NE distribution of the dsRed-PACT construct in cells co-expressing GFP or GFP-Nesprin-1 $\alpha$ , respectively.

### Statistical Analysis

Statistical tests were performed using GraphPad Prism and are described in each figure legend. The exact value of  $n$  is indicated within the respective figure. Statistical significance is represented as follows: \*\*\*  $p < 0.001$ ; \*\*  $p < 0.01$ , \*  $p < 0.05$ ; n.s., not statistically significant.

## DATA AND SOFTWARE AVAILABILITY

Mass spectrometry data is provided in supplemental material as [Data S1](#).

**Current Biology, Volume 27**

**Supplemental Information**

**Nesprin-1 $\alpha$ -Dependent Microtubule Nucleation  
from the Nuclear Envelope via Akap450 Is Necessary  
for Nuclear Positioning in Muscle Cells**

**Petra Gimpel, Yin Loon Lee, Radoslaw M. Sobota, Alessandra Calvi, Victoria Koullourou, Rutti Patel, Kamel Mamchaoui, François Nédélec, Sue Shackleton, Jan Schmoranzer, Brian Burke, Bruno Cadot, and Edgar R. Gomes**

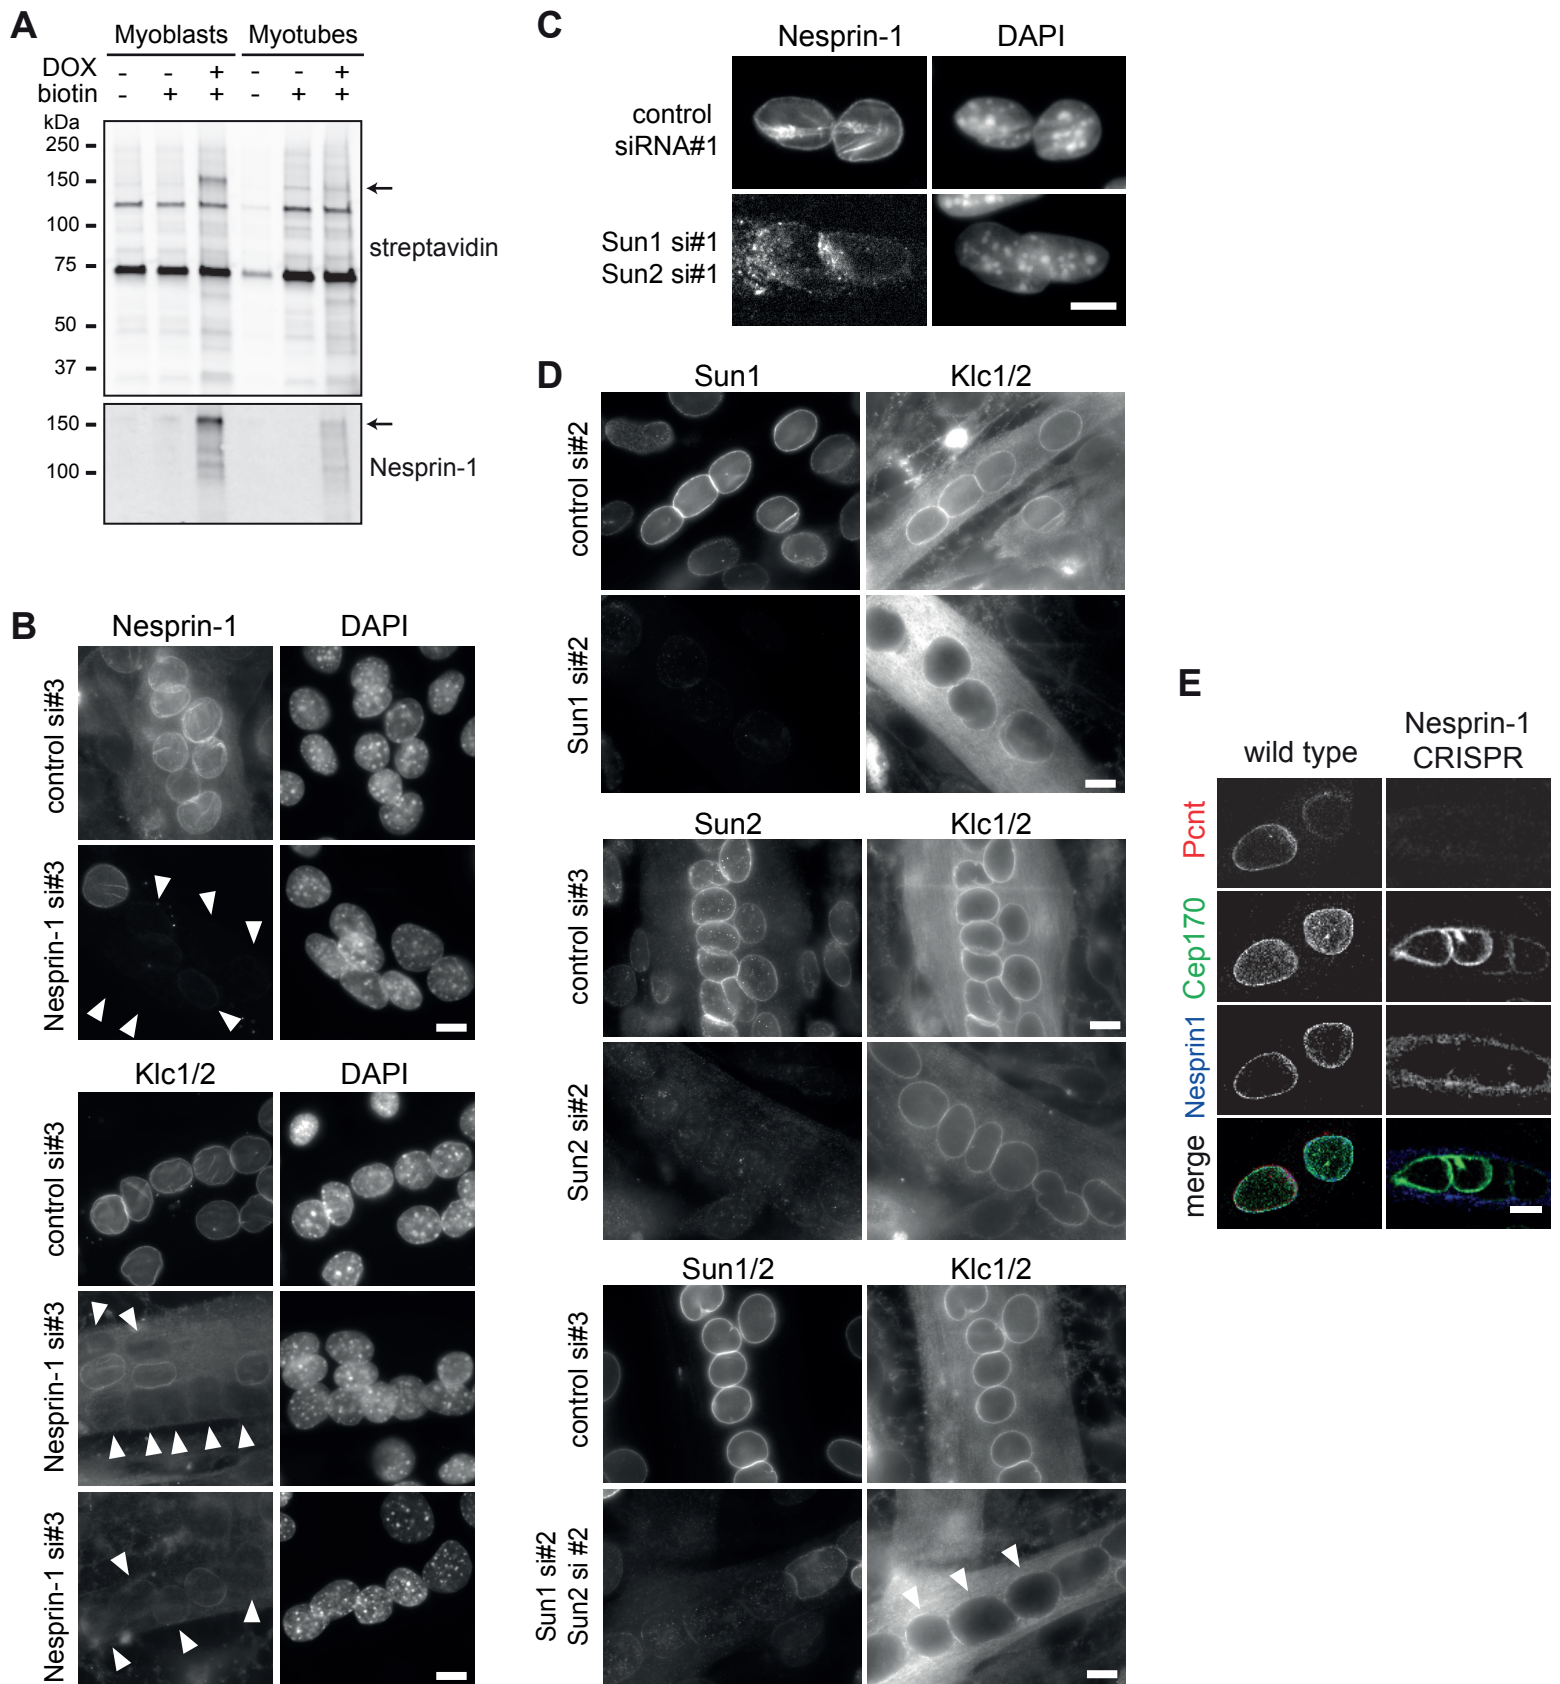

**Figure S1. BioID of Nesprin-1 $\alpha$  identifies known and novel proximal proteins. Related to Figure 1. (A)** C2C12 myoblasts or myotubes stably expressing myc-BirA\*-Nesprin-1 $\alpha$  were treated with or without doxycycline and biotin, harvested and subjected to affinity purification using streptavidin-beads. Expression of myc-BirA\*-Nesprin-1 $\alpha$  after doxycycline addition was confirmed by Western Blot using anti-Nesprin-1 (clone 9F10) antibody. Biotinylated proteins were detected using fluorescent conjugates of streptavidin. Arrows point to BioID-Nesprin-1 $\alpha$ . **(B)** C2C12 myotubes were transfected with the indicated siRNAs and stained for Nesprin-1 (MANNES1A) or Klc1/2 and nuclei (DAPI). Arrowheads indicate myonuclei with loss of Klc1/2 localisation to the NE following Nesprin-1 knockdown. Scale bar, 10  $\mu$ m. **(C)** 48 h differentiated C2C12 cells were transfected with the indicated siRNAs and stained for Nesprin-1 (MANNES1E) and nuclei (DAPI). Scale bar, 10  $\mu$ m. **(D)** C2C12 myotubes were transfected with the indicated siRNAs and stained for Klc1/2 and nuclei (DAPI). Arrowheads indicate myonuclei with loss of Klc1/2 localisation to the NE following double Sun1/Sun2 knockdown. Scale bar, 10  $\mu$ m. **(E)** Wild type or Nesprin-1 CRISPR mutant C2C12 myotubes were stained for Pericentrin (Pcnt, red), Cep170 (green), or Nesprin-1 (blue, 9F10). Scale bar, 10  $\mu$ m.



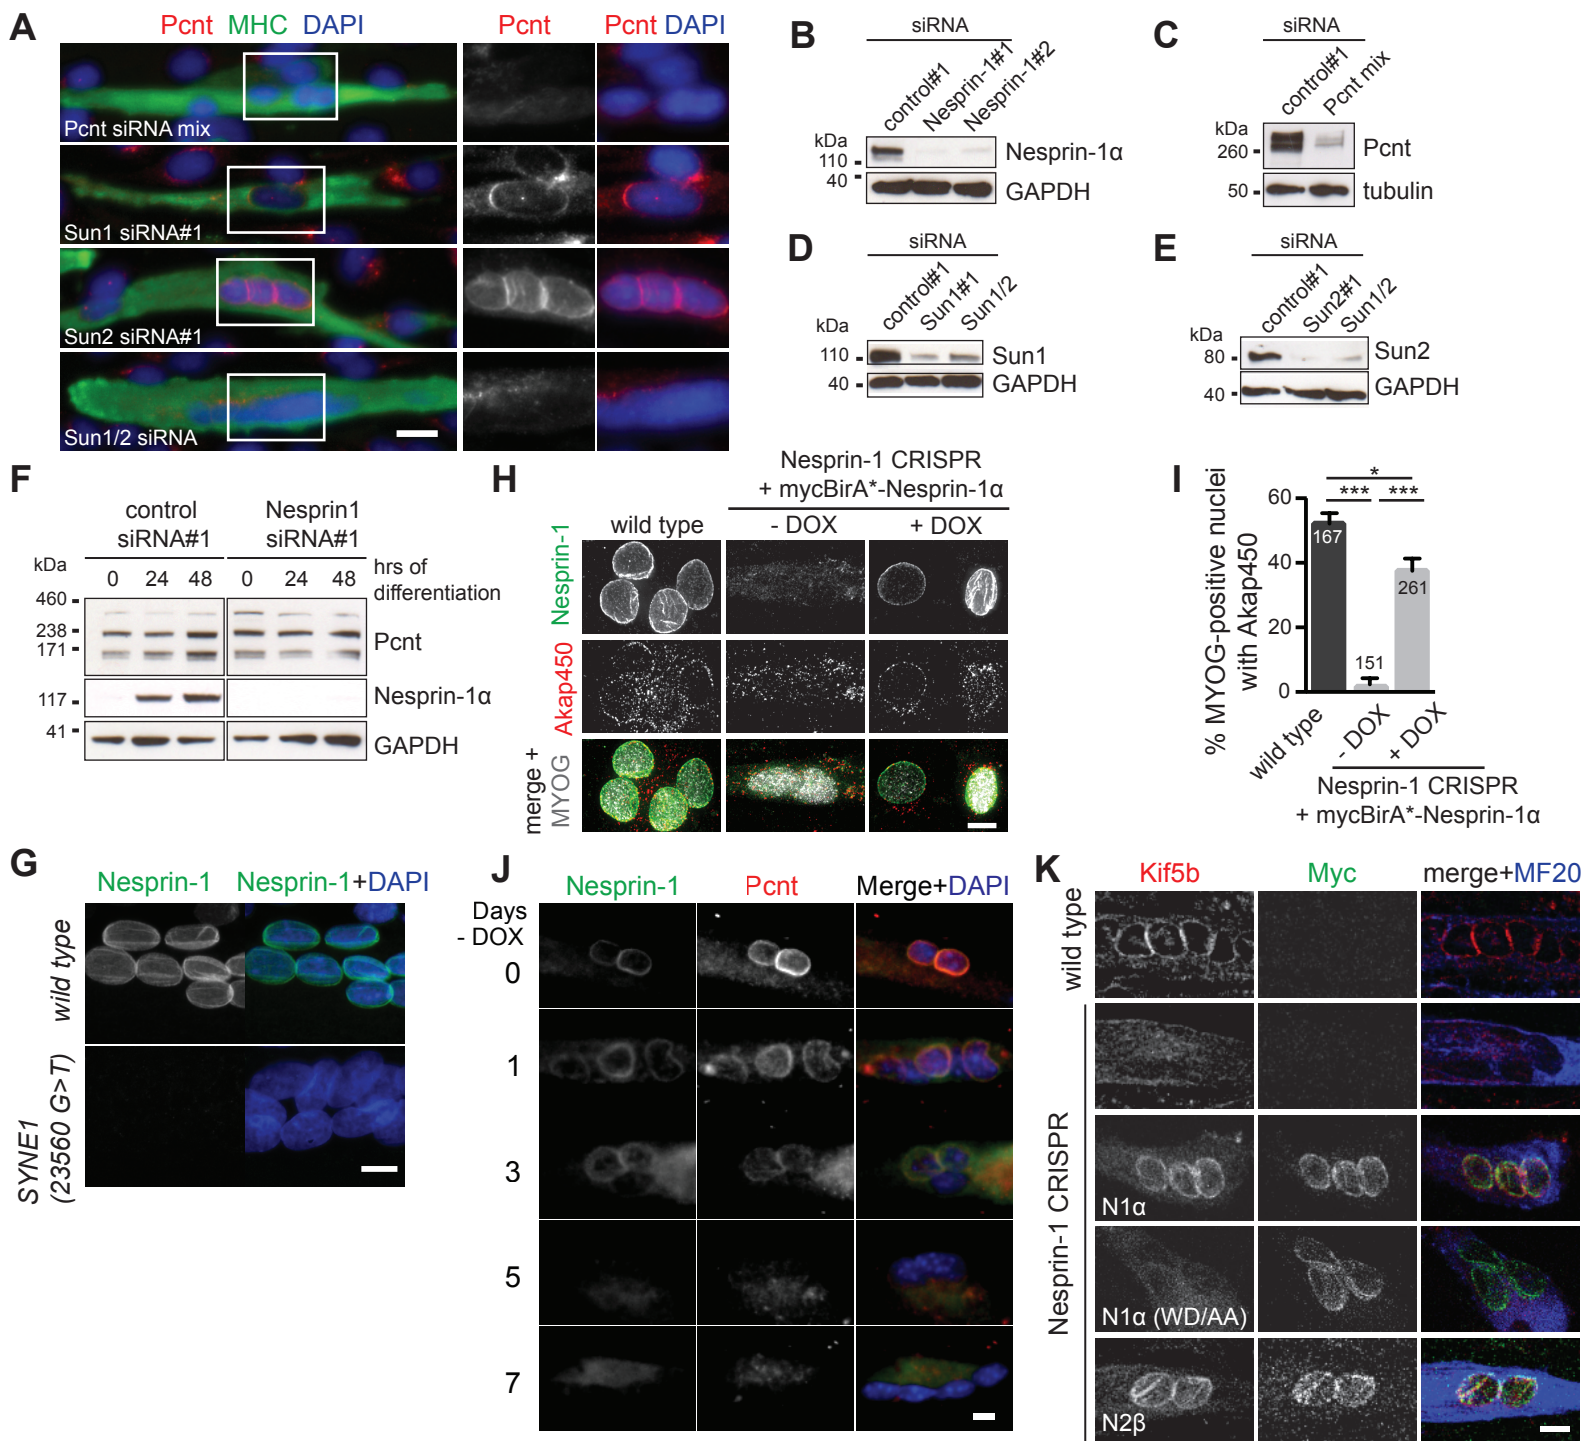

**Figure S2. Nesprin-1α-containing LINC complex recruits centrosomal proteins to the myotube NE. Related to Figure 2.**

(A) 48 h differentiated C2C12 cells were transfected with the indicated siRNAs and stained for Pericentrin (Pcnt, red), nuclei (DAPI, blue) and myosin heavy chain (MHC, green). Scale bar, 20  $\mu$ m. (B, C, D, E) Western Blot of 48 h differentiated C2C12 cells transfected with the indicated siRNAs, stained for Nesprin-1 $\alpha$  (MANNES1E) (B), Pericentrin (Pcnt) (C), Sun1 (D) or Sun2 (E), respectively, and for GAPDH or tubulin (YL 1/2) as a loading control. (F) C2C12 cells were treated with non-targeting control siRNA#1 or Nesprin-1 siRNA#1, differentiated for the indicated time points (hours of differentiation), subjected to SDS-PAGE and Western Blot analysis using anti-Pericentrin (Pcnt), anti-Nesprin-1 $\alpha$  (MANNES1E) and anti-GAPDH antibodies. (G) Differentiated human immortalized myotubes from a healthy control (wild type) or from a patient carrying a nonsense mutation within the *SYNE1* (23560 G>T) gene immunostained for Nesprin-1 $\alpha$ /Nesprin-1 (MANNES1E, green) and nuclei (DAPI, blue). Scale bar, 10  $\mu$ m. (H) C2C12 wild type or Nesprin-1 CRISPR mutant cells transduced with mycBirA\*-Nesprin-1 $\alpha$  without and with 1  $\mu$ g/ml doxycycline (-/+DOX) were differentiated for 48 h, fixed and stained for Nesprin-1 (green, clone 9F10), Akap450 (red), and Myogenin (MYOG, grey) Scale bar, 10  $\mu$ m. (I) Quantification of Akap450 recruitment to the NE in Myogenin (MYOG)-positive nuclei as described in (H). Error bars  $\pm$  SEM. n represents total number of nuclei from three independent experiments. \*\*\*p<0.001, \*p<0.05, one-way ANOVA with Tukey's multiple comparisons test. (J) Nesprin-1 CRISPR mutant C2C12 myotubes transduced with mycBirA\*-Nesprin-1 $\alpha$  were incubated with differentiation media containing doxycycline (DOX) for at least 24 hours and then switched to differentiation media lacking (-) doxycycline (DOX) for 0-7 days as indicated. Cells were then fixed and stained for Nesprin-1 (green, 9F10), Pericentrin (Pcnt, red) and nuclei (DAPI, blue). Scale bar, 10  $\mu$ m. (K) C2C12 wild type, untransduced Nesprin-1 CRISPR mutant cells or CRISPR mutant cells transduced with mycBirA\*-Nesprin-1 $\alpha$  (N1 $\alpha$ ), mycBirA\*-Nesprin-1 $\alpha$  with the LEWD motif mutated to LEAA (N1 $\alpha$  (WD/AA)), or mycBirA\*-Nesprin-2 $\beta$  (N2 $\beta$ ) were incubated with doxycycline and differentiated for 48 h, fixed and stained for Kif5b (red), Myc (green) and myosin heavy chain (clone MF20, blue). Scale bar, 10  $\mu$ m.



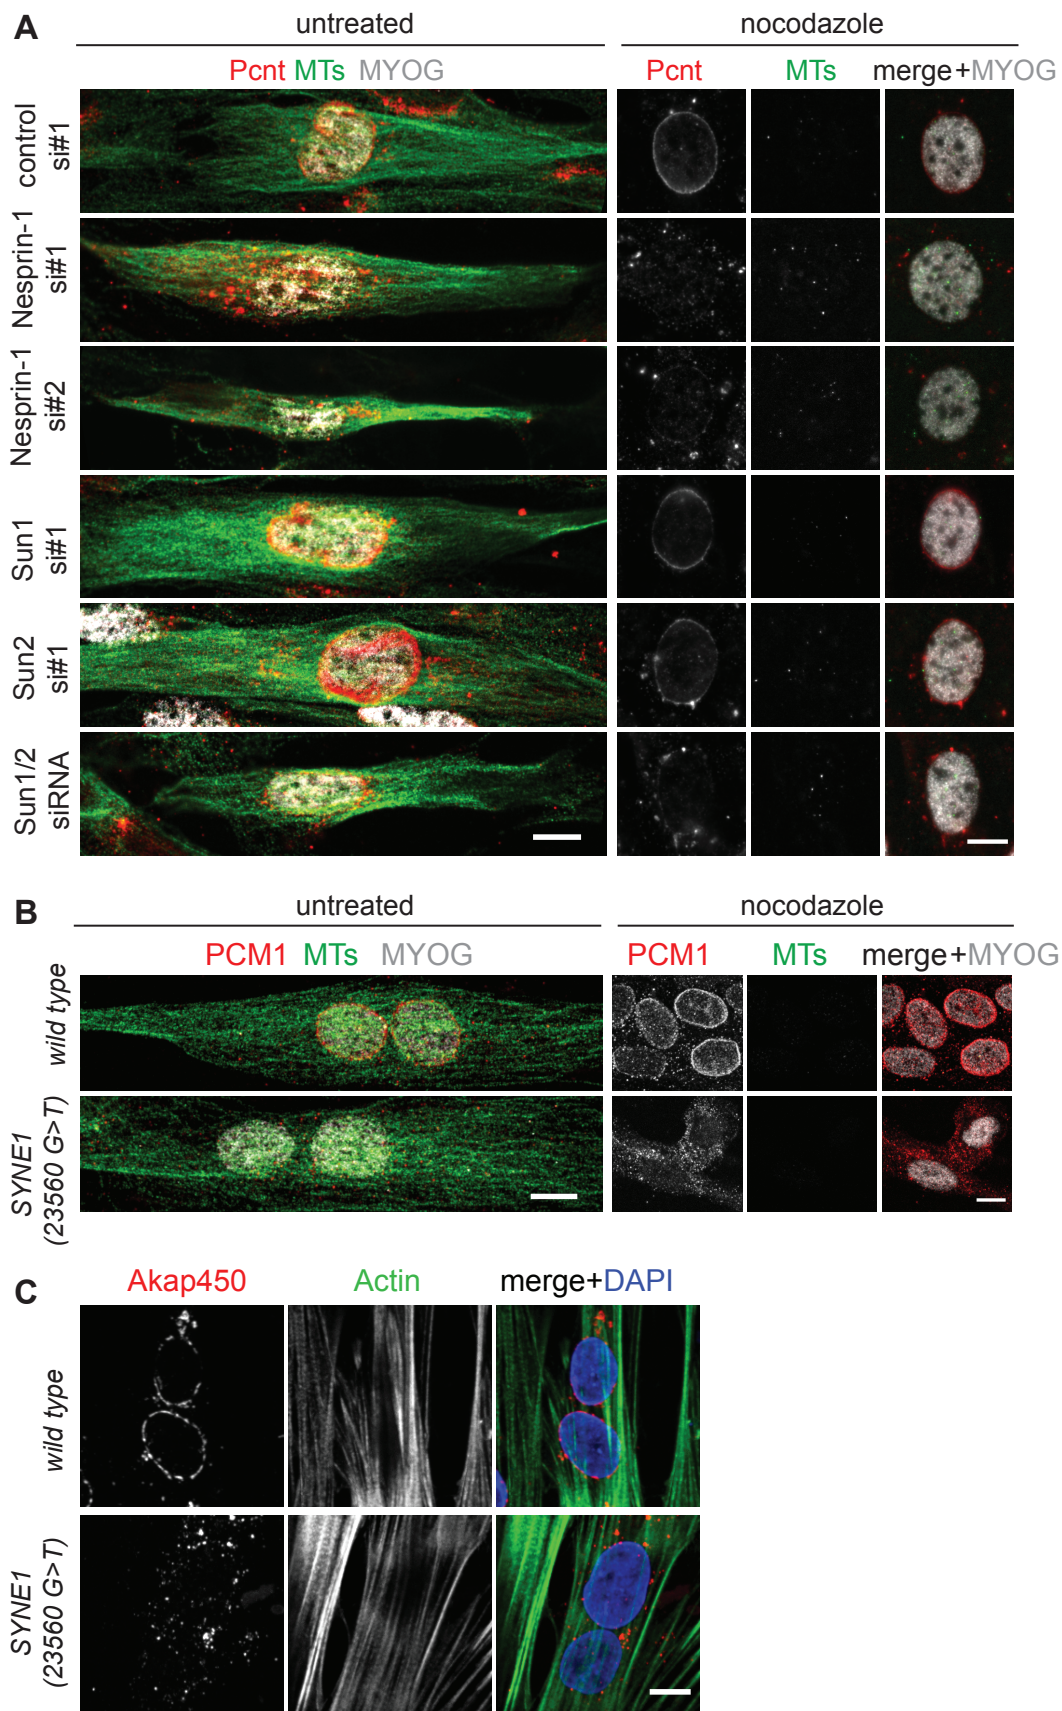

**Figure S3. Disruption of LINC complex does not affect overall microtubule or actin organization. Related to Figure 3.**

**(A)** 48 h differentiated C2C12 cells, treated with non-targeting control (NC) siRNA#1, two different siRNAs to Nesprin-1 (Nesprin-1 #1 or Nesprin-1 #2), Sun1, Sun2 or both Sun1 and Sun2 (Sun1/2) siRNAs, were incubated with or without (untreated) nocodazole and immunostained for Pericentrin (Pcnt, red), microtubules (MTs, green) and Myogenin (MYOG, grey). Scale bar, 10  $\mu$ m. **(B)** Human immortalized myotubes from a healthy control (wild type) or from a patient carrying a nonsense mutation within the *SYNE1* (23560 G>T) gene were treated with or without (untreated) nocodazole and immunostained for PCM1 (red), microtubules (MTs, green) and nuclei (DAPI, blue). Scale bar, 10  $\mu$ m. **(C)** Human immortalized myotubes from a healthy control (wild type) or from a patient carrying a nonsense mutation within the *SYNE1* (23560 G>T) gene were stained for Akap450 (red), actin (green, phalloidin) and nuclei (DAPI, blue). Scale bar, 10  $\mu$ m.

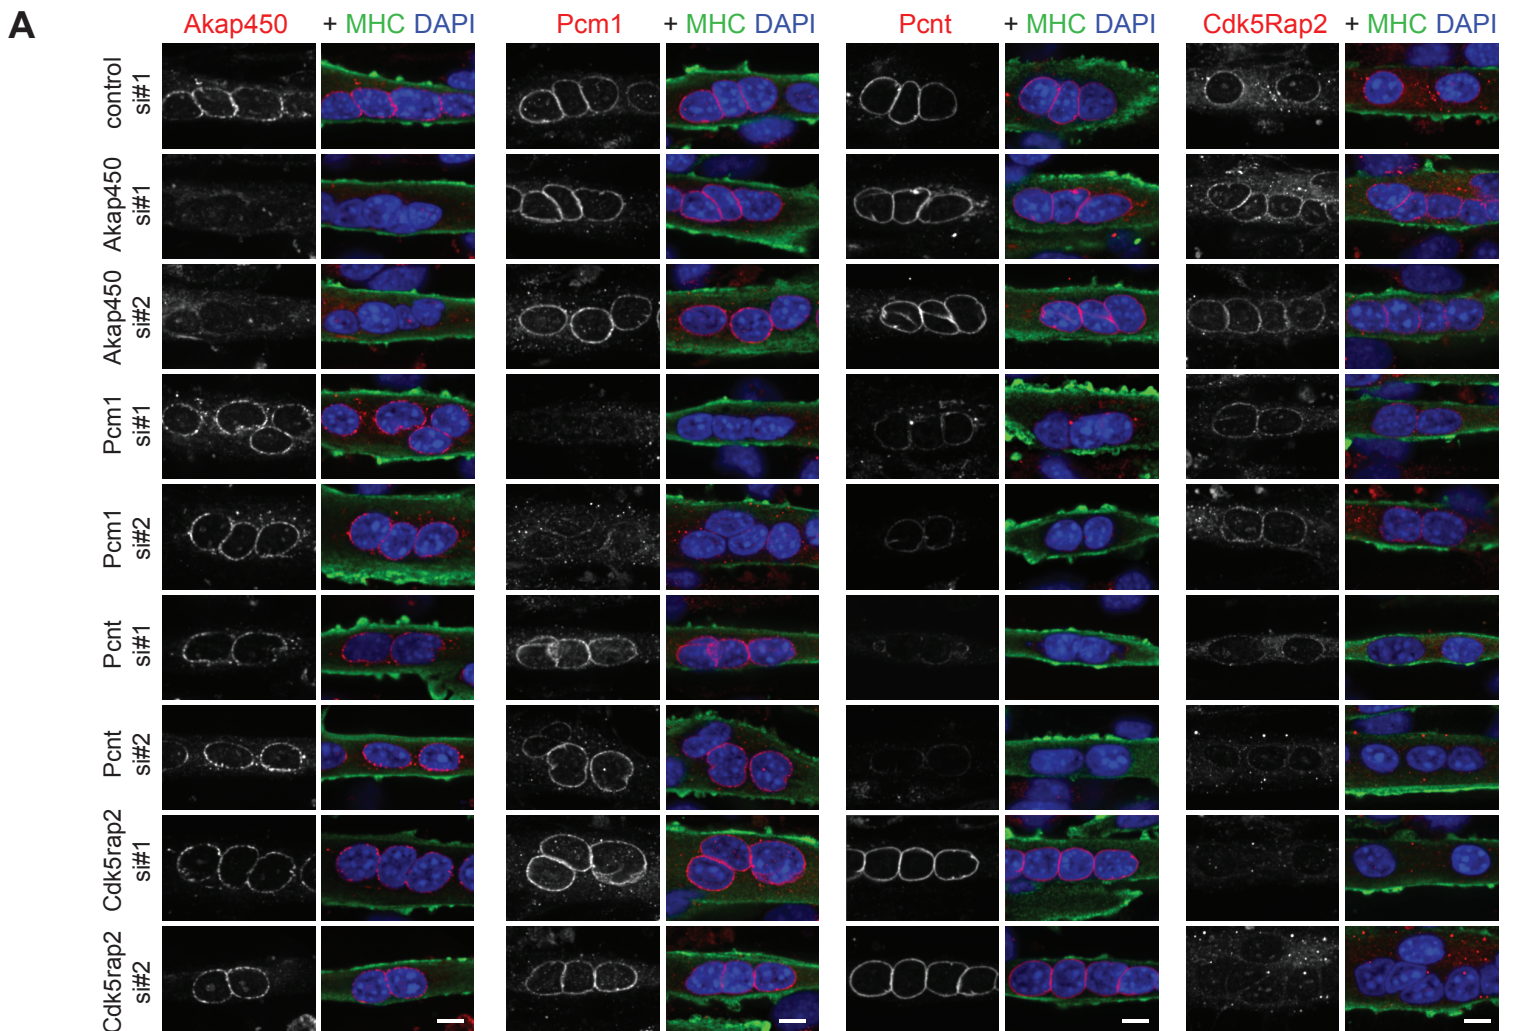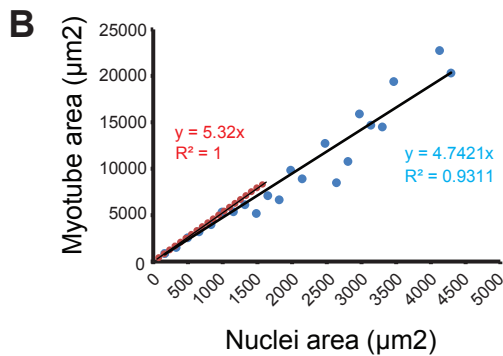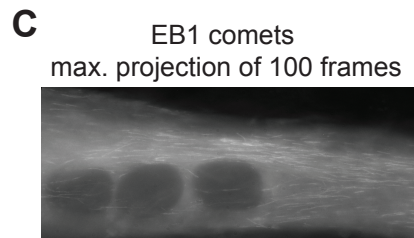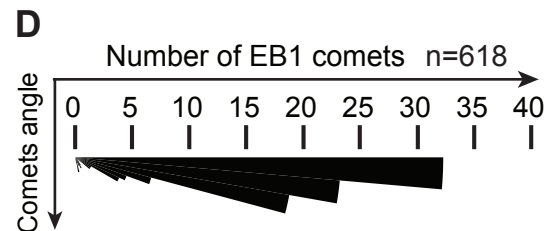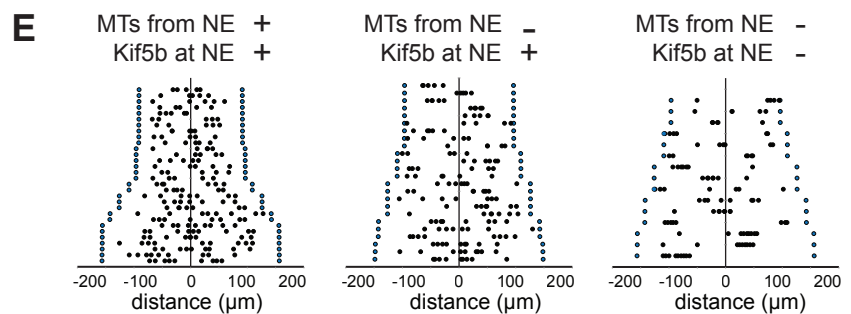

**Figure S4. Computer simulations reveal role for Akap450-mediated MT nucleation in nuclear positioning independent of other centrosomal proteins. Related to Figure 4. (A)** C2C12 cells were transfected with the indicated siRNAs, differentiated into myotubes for 48 hours and stained for Akap450, Pcm1, Pericentrin (Pcnt) or Cdk5Rap2 (red), myosin heavy chain (MHC, green) and nuclei (DAPI, blue). Scale bar, 10  $\mu\text{m}$ . **(B)** The myotube area was plotted over the number of nuclei for C2C12 myotubes (blue dots) or for simulated myotubes generated using Cytosim (red dots). **(C)** EB1-GFP-expressing myotubes were imaged using stream acquisition (250 ms/frame). We used a maximum projection of 100 frames to measure the angle of each comet compared to the long axis of the myotube. **(D)** All comet angles were then normalized over a 90° quadrant and distributed in 5° steps, thus revealing a preferential orientation of EB1 comets towards the long axis of the myotube. **(E)** Two-dimensional representations of nuclear distributions in myotubes after computer simulations. We compared nuclear positioning in myotubes with MT nucleation activity and Kif5b motor proteins at the NE (control; MTs from NE+, Kif5b at NE+), without MT nucleation activity but Kif5b motor proteins at the NE (MTs from NE-; Kif5b at NE+) or without both MT nucleation activity and Kif5b motor proteins at the NE (MTs from NE-; Kif5b at NE-). Thereby, each myotube is represented on a single line with blue dots representing the myotube edges and black dots the nuclei.



| Name                                  | Value                                    | Note                                                                                                                                               |
|---------------------------------------|------------------------------------------|----------------------------------------------------------------------------------------------------------------------------------------------------|
| <b>Global</b>                         |                                          |                                                                                                                                                    |
| Time step                             | 0.05s                                    | Computational parameter                                                                                                                            |
| Viscosity                             | 0.1pN s/mm <sup>2</sup>                  | Estimate viscosity of the cytoplasm, [S1]                                                                                                          |
| kT                                    | 0.0042 pN mm                             | Thermal energy at 25°C                                                                                                                             |
| Cell geometry                         | R=7um L=190 mm / 5 nuclei                | Ellipse                                                                                                                                            |
|                                       | L=228 mm / 6 nuclei                      |                                                                                                                                                    |
|                                       | L=266mm / 7 nuclei                       |                                                                                                                                                    |
|                                       | L=304mm / 8 nuclei                       |                                                                                                                                                    |
|                                       | L=342mm / 9 nuclei                       |                                                                                                                                                    |
| <b>Microtubules</b>                   |                                          |                                                                                                                                                    |
| Rigidity                              | 20 pN mm <sup>2</sup>                    | Flexural rigidity [S2-S4]                                                                                                                          |
| Segmentation                          | 4 mm                                     | computational parameter                                                                                                                            |
| Dynamics                              | growing speed= 0.4 mm/s                  | measures (growing speed only)                                                                                                                      |
|                                       | Shrinking speed= 0.8 mm/s                | [S5]                                                                                                                                               |
|                                       | hydrolysis rate= 0.5 mm/s                | [S5]                                                                                                                                               |
| Growing forces                        | fg=1.5pN                                 | growing velocity is slowed down by antagonistic force on plus end.                                                                                 |
|                                       | Stiffness = 500 pN/ mm                   |                                                                                                                                                    |
| Total polymer                         | 7000 per nucleus                         | to limit the length of MTs                                                                                                                         |
| <b>Kinesin (Kif5b)</b>                |                                          |                                                                                                                                                    |
| Binding                               | Range= 0.05 mm                           | Maximal distance to which a binder can bind a filament                                                                                             |
|                                       | Rate = 5 s <sup>-1</sup>                 | Rate at which possible binding can occur                                                                                                           |
| Unbinding                             | Force= 5 pN                              | Unbinding increases with load exponentially                                                                                                        |
|                                       | Rate= 0.1 s <sup>-1</sup>                | [S6]                                                                                                                                               |
| Stiffness                             | 200pN/mm                                 |                                                                                                                                                    |
| Motility                              | Max speed vm= 0.8 mm/s                   | [S6]                                                                                                                                               |
|                                       | stall force fs=5 pN                      |                                                                                                                                                    |
| <b>Crossslider kif5b/Map7 like</b>    |                                          |                                                                                                                                                    |
| Diffusion                             | 20 mm <sup>2</sup> /s                    |                                                                                                                                                    |
| Stiffness                             | 500pN                                    |                                                                                                                                                    |
| Activity                              | Slide                                    | Map7 moves in the direction of the applied force, with the specified mobility                                                                      |
| Binding                               | Range= 0.1mm                             | Maximal distance to which a binder can bind a filament                                                                                             |
|                                       | Rate = 10 s <sup>-1</sup>                | Rate at which possible binding can occur                                                                                                           |
| Unbinding                             | Force = 1 pN                             | Load force needed to unbind                                                                                                                        |
|                                       | Rate = 10 s <sup>-1</sup>                | Rate at which possible unbinding can occur                                                                                                         |
| Motility                              | 0.1 mm.s <sup>-1</sup> .pN <sup>-1</sup> |                                                                                                                                                    |
| Quantity                              | 200 per nucleus                          |                                                                                                                                                    |
| <b>Map4</b>                           |                                          |                                                                                                                                                    |
| Binding                               | Range= 0.1 mm                            | Maximal distance to which a binder can bind a filament                                                                                             |
|                                       | Rate = 2 s <sup>-1</sup>                 | Rate at which possible binding can occur                                                                                                           |
| Unbinding                             | Force= 3 pN                              | Load force needed to unbind                                                                                                                        |
|                                       | Rate= 1 s <sup>-1</sup>                  | Rate at which possible unbinding can occur                                                                                                         |
| <b>Crosslinker Map4/Map4</b>          |                                          |                                                                                                                                                    |
| Diffusion                             | 20 mm <sup>2</sup> /s                    |                                                                                                                                                    |
| Stiffness                             | k=200pN                                  |                                                                                                                                                    |
| Activity                              | Bridge                                   | [S7]                                                                                                                                               |
| Specificity                           | Antiparallel                             | [S7]                                                                                                                                               |
| Quantity                              | 400 per nucleus                          |                                                                                                                                                    |
| <b>Dynein</b>                         |                                          |                                                                                                                                                    |
| Binding                               | Range= 0.05 mm                           | [S8], [S9]                                                                                                                                         |
|                                       | Rate = 5 s <sup>-1</sup>                 |                                                                                                                                                    |
| Unbinding                             | Force= 3 pN                              | [S10]                                                                                                                                              |
|                                       | Rate= 0.1 s <sup>-1</sup>                | motors unbinding rate is deduced from measurements of dynein processivity ~ 1-2 μm (reviewed in [S9]) and dynein velocity ~ 1.5 μm s <sup>-1</sup> |
| Stiffness                             | k=200 pN/mm                              |                                                                                                                                                    |
| Motility                              | Max speed vm= 1 mm/s                     | [S11], [S12], [S3]; reviewed in [S9]                                                                                                               |
|                                       | stall force fs=5 pN                      | Measurements ~1-7 ([S11], [S13]; reviewed in [S12] and [S9])                                                                                       |
| <b>Nuclei</b>                         |                                          |                                                                                                                                                    |
| Quantity                              | 5 to 9                                   | Density is 1 nuclei/ 700um <sup>2</sup> of myotube (measured)                                                                                      |
| Radius                                | 5 mm                                     |                                                                                                                                                    |
| Nucleator (Gamma-tubulin)             | Quantity = 58 / nucleus                  | The nucleators nucleate independently.                                                                                                             |
|                                       | Nucleation rate = 0.02 s <sup>-1</sup>   | 50 possible new MTs per second and per nucleator                                                                                                   |
|                                       | Unbinding rate = 0.1s <sup>-1</sup>      |                                                                                                                                                    |
|                                       | Unbinding force= 3 pN                    |                                                                                                                                                    |
|                                       | Stiffness = 1000pN/mm                    |                                                                                                                                                    |
| Kif5b                                 | Quantity = 30 / nucleus                  | Fixed at the NE, stiffness = 200pN/um                                                                                                              |
| Dynein                                | Quantity = 18 / nucleus                  | Fixed at the NE, stiffness = 200pN/um                                                                                                              |
| <b>Centrioles (when no Nesprin-1)</b> |                                          |                                                                                                                                                    |
| Quantity                              | 5 per nucleus                            |                                                                                                                                                    |
| Radius                                | 0.2 mm                                   |                                                                                                                                                    |
| MT nucleation sites                   | 11                                       |                                                                                                                                                    |

Table S1. Parameters for the Cytosim computer simulations. Related to Figure 4G.

## Supplemental References

- S1. Daniels, B.R., Masi, B.C., and Wirtz, D. (2006). Probing Single-Cell Micromechanics In Vivo: The Microrheology of *C. elegans* Developing Embryos. *Biophysical Journal* 90, 4712–4719.
- S2. Dogterom, M., and Yurke, B. (1997). Measurement of the Force-Velocity Relation for Growing Microtubules. *Science* 278, 856–860.
- S3. Kimura, A., and Onami, S. (2005). Computer simulations and image processing reveal length-dependent pulling force as the primary mechanism for *C. elegans* male pronuclear migration. *Dev. Cell* 8, 765–775.
- S4. Kozlowski, C., Srayko, M., and Nédélec, F. (2007). Cortical microtubule contacts position the spindle in *C. elegans* embryos. *Cell* 129, 499–510.
- S5. Brun, L., Rupp, B., Ward, J.J., and Nédélec, F. (2009). A theory of microtubule catastrophes and their regulation. *Proc. Natl. Acad. Sci. U.S.A.* 106, 21173–21178.
- S6. Andreasson, J.O., Milic, B., Chen, G.-Y., Guydosh, N.R., Hancock, W.O., and Block, S.M. (2015). Examining kinesin processivity within a general gating framework. *eLife* 4, e07403.
- S7. Mogessie, B., Roth, D., Rahil, Z., and Straube, A. (2015). A novel isoform of MAP4 organises the paraxial microtubule array required for muscle cell differentiation. *eLife Sciences* 4, e05697.
- S8. De Simone, A., Nédélec, F., and Gönczy, P. (2016). Dynein Transmits Polarized Actomyosin Cortical Flows to Promote Centrosome Separation. *Cell Rep* 14, 2250–2262.
- S9. Goodman, B.S., Derr, N.D., and Reck-Peterson, S.L. (2012). Engineered, harnessed, and hijacked: synthetic uses for cytoskeletal systems. *Trends Cell Biol.* 22, 644–652.
- S10. Rupp, B., and Nédélec, F. (2012). Patterns of molecular motors that guide and sort filaments. *Lab Chip* 12, 4903–4910.
- S11. Athale, C.A., Dinarina, A., Nédélec, F., and Karsenti, E. (2014). Collective behavior of minus-ended motors in mitotic microtubule asters gliding toward DNA. *Phys Biol* 11, 16008.
- S12. Schief, W.R., and Howard, J. (2001). Conformational changes during kinesin motility. *Curr. Opin. Cell Biol.* 13, 19–28.
- S13. Goshima, G., Nédélec, F., and Vale, R.D. (2005). Mechanisms for focusing mitotic spindle poles by minus end-directed motor proteins. *J. Cell Biol.* 171, 229–240.
- S14. Haque, F., Lloyd, D.J., Smallwood, D.T., Dent, C.L., Shanahan, C.M., Fry, A.M., Trembath, R.C., and Shackleton, S. (2006). SUN1 interacts with nuclear lamin A and cytoplasmic nesprins to provide a physical connection between the nuclear lamina and



the cytoskeleton. *Mol. Cell. Biol.* 26, 3738–3751.
